# Supplementary material for: Incidence and risk factors of hepatitis E virus infection in women with gynecological tumors in Eastern China
Source: PeerJ. 2024 Dec 18;12:e18747. doi: 10.7717/peerj.18747 (PMC11662898; doi:10.7717/peerj.18747)
Supplement: Supplemental Information 1 [file peerj-12-18747-s001.xlsx]

## Sheet: patients with tumor
No.	Age	Clinical diagnosis	Residence area	Contact with cats	Contact with dogs	Contact with swine	Consumption of raw/undercooked meat	Consumption of raw vegetables	Exposure to soil	Source of drinking water	occupation	History of abortion	History of chemotherapy	Blood transfusion history	IgG	IgM	Positive	Follow up time(:months)
1	70	Cervical squamous cell carcinoma	rural	no	yes	no	no	no	yes	tap	farmer	yes	yes	no	negative	negative	negative	62
2	73	Cervical squamous cell carcinoma	urban	no	yes	no	no	no	yes	tap	worker	yes	no	yes	positive	negative	positive	62
3	64	Cervical squamous cell carcinoma	urban	yes	yes	no	no	no	yes	tap	farmer	yes	yes	yes	negative	negative	negative	12
4	75	Cervical squamous cell carcinoma	rural	yes	yes	no	yes	no	no	tap	worker	yes	yes	yes	positive	negative	positive	12
5	72	Cervical squamous cell carcinoma	urban	no	yes	yes	no	no	yes	tap	worker	yes	yes	yes	positive	positive	positive	12
6	65	Cervical squamous cell carcinoma	rural	no	yes	no	no	no	yes	tap	farmer	yes	yes	yes	negative	negative	negative	60
7	69	Cervical squamous cell carcinoma	rural	no	yes	no	no	no	no	tap	worker	yes	yes	yes	negative	negative	negative	12
8	72	Cervical squamous cell carcinoma	urban	no	yes	yes	no	yes	no	tap	worker	yes	yes	yes	positive	negative	positive	60
9	73	Cervical squamous cell carcinoma	urban	no	no	yes	no	no	yes	tap	worker	yes	yes	no	negative	negative	negative	12
10	64	Cervical squamous cell carcinoma	urban	no	no	no	no	yes	no	tap	worker	yes	yes	yes	negative	negative	negative	59
11	42	Cervical squamous cell carcinoma	rural	yes	no	no	yes	yes	yes	river	worker	yes	no	no	negative	negative	negative	59
12	73	Cervical squamous cell carcinoma	urban	no	no	yes	no	yes	yes	river	worker	yes	no	no	negative	negative	negative	59
13	64	Cervical squamous cell carcinoma	urban	yes	no	no	no	no	yes	river	farmer	yes	no	no	negative	negative	negative	58
14	63	Cervical squamous cell carcinoma	rural	no	yes	no	no	no	no	tap	farmer	yes	yes	yes	negative	negative	negative	58
15	66	Cervical squamous cell carcinoma	rural	no	no	no	no	yes	no	river	farmer	yes	no	no	negative	negative	negative	58
16	73	Cervical squamous cell carcinoma	urban	no	no	no	yes	no	yes	river	farmer	yes	no	no	negative	negative	negative	58
17	61	Cervical squamous cell carcinoma	rural	no	yes	no	no	yes	no	tap	farmer	yes	yes	yes	positive	negative	positive	58
18	70	Cervical squamous cell carcinoma	urban	yes	no	no	yes	no	no	tap	worker	yes	no	no	negative	negative	negative	58
19	66	Cervical squamous cell carcinoma	urban	yes	no	no	no	no	no	tap	worker	yes	no	no	negative	negative	negative	58
20	63	Cervical squamous cell carcinoma	urban	yes	no	no	no	no	no	tap	worker	yes	no	no	negative	negative	negative	58
21	73	Cervical squamous cell carcinoma	urban	no	no	yes	no	no	no	tap	worker	yes	no	no	positive	negative	positive	57
22	69	Cervical squamous cell carcinoma	urban	yes	yes	no	no	no	no	tap	farmer	yes	no	yes	negative	negative	negative	57
23	65	Cervical squamous cell carcinoma	urban	yes	no	no	no	no	no	tap	farmer	yes	no	no	negative	negative	negative	57
24	70	Cervical squamous cell carcinoma	rural	no	no	yes	no	no	no	tap	farmer	yes	no	no	negative	negative	negative	57
25	71	Cervical squamous cell carcinoma	urban	no	no	no	no	no	yes	tap	farmer	yes	no	no	negative	negative	negative	57
26	65	Cervical squamous cell carcinoma	urban	no	no	no	yes	no	yes	tap	farmer	yes	no	no	negative	negative	negative	55
27	63	Cervical squamous cell carcinoma	urban	no	yes	no	yes	no	yes	tap	farmer	yes	no	no	negative	negative	negative	55
28	70	Cervical squamous cell carcinoma	urban	yes	yes	no	no	no	yes	tap	farmer	no	no	no	negative	negative	negative	55
29	73	Cervical squamous cell carcinoma	rural	yes	yes	no	no	no	yes	tap	farmer	no	no	no	negative	negative	negative	55
30	64	Cervical squamous cell carcinoma	rural	yes	yes	no	no	no	yes	tap	farmer	no	no	yes	negative	negative	negative	54
31	70	Cervical squamous cell carcinoma	rural	yes	yes	yes	yes	no	no	tap	farmer	no	no	yes	positive	negative	positive	54
32	51	Cervical squamous cell carcinoma	urban	yes	yes	yes	no	yes	yes	tap	farmer	no	no	yes	negative	negative	negative	54
33	59	Cervical squamous cell carcinoma	urban	yes	yes	no	yes	no	yes	tap	farmer	no	no	yes	negative	negative	negative	54
34	70	Cervical squamous cell carcinoma	rural	no	yes	no	no	no	yes	tap	farmer	no	no	no	negative	negative	negative	53
35	76	Cervical squamous cell carcinoma	urban	no	yes	yes	no	no	yes	tap	farmer	no	no	no	negative	negative	negative	53
36	71	Cervical squamous cell carcinoma	urban	no	yes	yes	yes	no	no	tap	farmer	no	no	no	positive	negative	positive	53
37	77	Cervical squamous cell carcinoma	urban	no	yes	no	no	no	yes	tap	worker	no	no	yes	negative	negative	negative	53
38	63	Cervical squamous cell carcinoma	rural	no	yes	no	no	no	yes	tap	farmer	yes	yes	no	negative	negative	negative	53
39	72	Cervical squamous cell carcinoma	urban	no	yes	no	yes	no	yes	tap	worker	no	no	yes	negative	negative	negative	52
40	74	Cervical squamous cell carcinoma	urban	no	yes	yes	no	no	yes	tap	worker	no	no	yes	negative	negative	negative	52
41	72	Cervical squamous cell carcinoma	urban	no	yes	no	no	no	yes	tap	farmer	no	yes	no	negative	negative	negative	52
42	78	Cervical squamous cell carcinoma	urban	no	no	no	no	no	no	tap	worker	no	no	yes	negative	negative	negative	52
43	63	Cervical squamous cell carcinoma	urban	no	yes	yes	no	no	no	tap	worker	no	no	yes	negative	negative	negative	52
44	59	Cervical squamous cell carcinoma	urban	no	yes	no	no	no	yes	tap	worker	no	no	yes	negative	negative	negative	51
45	70	Cervical squamous cell carcinoma	rural	no	yes	yes	no	no	no	tap	worker	no	no	yes	negative	negative	negative	51
46	41	Cervical squamous cell carcinoma	rural	no	yes	no	no	no	no	tap	worker	no	no	no	negative	negative	negative	51
47	65	Cervical squamous cell carcinoma	urban	no	yes	no	yes	no	no	tap	worker	no	no	yes	negative	negative	negative	51
48	64	Cervical squamous cell carcinoma	rural	no	yes	no	yes	no	no	tap	worker	no	no	no	negative	negative	negative	58
49	64	Cervical squamous cell carcinoma	urban	no	yes	no	no	no	no	tap	worker	no	no	yes	positive	positive	positive	58
50	64	Cervical squamous cell carcinoma	urban	no	yes	yes	yes	no	yes	tap	worker	no	no	yes	positive	positive	positive	56
51	65	Cervical squamous cell carcinoma	urban	no	yes	no	no	no	no	tap	worker	no	no	yes	positive	positive	positive	56
52	64	Cervical squamous cell carcinoma	rural	no	yes	no	no	no	no	tap	farmer	no	yes	no	positive	positive	positive	56
53	68	Cervical squamous cell carcinoma	rural	no	yes	yes	yes	no	no	tap	worker	no	no	yes	positive	positive	positive	56
54	72	Cervical squamous cell carcinoma	rural	no	yes	yes	no	no	yes	tap	worker	no	no	yes	positive	negative	positive	56
55	70	Cervical squamous cell carcinoma	urban	no	yes	no	no	no	yes	tap	worker	no	no	yes	negative	negative	negative	55
56	78	Cervical squamous cell carcinoma	urban	no	yes	no	no	no	no	tap	worker	no	no	yes	negative	negative	negative	55
57	61	Cervical squamous cell carcinoma	urban	no	yes	no	yes	no	no	tap	worker	no	no	yes	negative	negative	negative	55
58	63	Cervical squamous cell carcinoma	urban	no	yes	no	no	yes	no	tap	farmer	yes	yes	yes	negative	negative	negative	54
59	64	Cervical squamous cell carcinoma	urban	yes	no	no	no	no	yes	tap	worker	yes	yes	yes	negative	negative	negative	54
60	64	Cervical squamous cell carcinoma	rural	no	yes	no	no	no	no	tap	farmer	no	yes	no	negative	negative	negative	54
61	70	Cervical squamous cell carcinoma	urban	yes	no	yes	no	no	yes	tap	worker	yes	yes	no	negative	negative	negative	54
62	61	Cervical squamous cell carcinoma	rural	no	yes	no	no	no	no	tap	worker	yes	yes	no	negative	negative	negative	53
63	65	Cervical squamous cell carcinoma	urban	no	yes	no	no	no	no	tap	farmer	no	yes	no	negative	negative	negative	54
64	59	Cervical squamous cell carcinoma	urban	no	no	no	no	no	no	tap	farmer	no	yes	yes	negative	negative	negative	55
65	64	Cervical squamous cell carcinoma	rural	no	no	no	no	no	no	tap	farmer	no	yes	no	negative	negative	negative	56
66	58	Cervical squamous cell carcinoma	rural	no	no	yes	no	no	no	tap	farmer	no	yes	yes	negative	negative	negative	58
67	58	Cervical squamous cell carcinoma	urban	yes	yes	no	no	no	no	tap	farmer	yes	yes	yes	positive	negative	positive	59
68	63	Cervical squamous cell carcinoma	urban	yes	yes	no	no	no	no	tap	farmer	yes	yes	yes	negative	negative	negative	60
69	70	Cervical squamous cell carcinoma	rural	yes	yes	no	no	no	no	tap	worker	yes	yes	yes	negative	negative	negative	62
70	68	Cervical squamous cell carcinoma	urban	yes	yes	no	yes	no	no	tap	farmer	yes	yes	yes	negative	negative	negative	63
71	71	Cervical squamous cell carcinoma	urban	no	yes	no	no	no	yes	tap	farmer	yes	yes	no	negative	negative	negative	65
72	72	Cervical squamous cell carcinoma	rural	yes	yes	no	no	no	yes	tap	worker	yes	yes	no	negative	negative	negative	66
73	66	Cervical squamous cell carcinoma	rural	yes	yes	no	yes	no	no	tap	worker	yes	yes	yes	negative	negative	negative	67
74	42	Cervical squamous cell carcinoma	urban	yes	yes	no	yes	yes	no	tap	worker	yes	yes	yes	negative	negative	negative	68
75	70	Cervical squamous cell carcinoma	rural	no	yes	no	no	no	yes	tap	worker	yes	no	no	negative	negative	negative	69
76	66	Cervical squamous cell carcinoma	urban	no	yes	no	no	no	no	tap	worker	yes	no	yes	negative	negative	negative	70
77	64	Cervical squamous cell carcinoma	urban	no	yes	no	no	no	no	tap	worker	yes	no	yes	negative	negative	negative	71
78	65	Cervical squamous cell carcinoma	urban	no	yes	no	no	no	no	tap	worker	yes	no	no	negative	negative	negative	71
79	65	Cervical squamous cell carcinoma	urban	no	yes	yes	no	no	yes	tap	worker	yes	no	yes	negative	negative	negative	71
80	63	Cervical squamous cell carcinoma	urban	no	yes	no	yes	no	no	tap	worker	yes	no	yes	negative	negative	negative	71
81	65	Cervical squamous cell carcinoma	rural	no	yes	yes	no	no	no	tap	worker	yes	no	no	negative	negative	negative	71
82	64	Cervical squamous cell carcinoma	urban	no	yes	yes	no	no	no	tap	worker	yes	no	no	negative	negative	negative	70
83	71	Cervical squamous cell carcinoma	urban	no	no	yes	no	no	yes	tap	worker	yes	no	yes	negative	negative	negative	70
84	72	Cervical squamous cell carcinoma	urban	no	no	no	no	no	no	tap	worker	yes	no	yes	negative	negative	negative	70
85	50	Endometrial cancer	urban	no	no	no	no	no	yes	tap	farmer	no	yes	no	positive	negative	positive	69
86	59	Endometrial cancer	urban	no	no	no	yes	no	no	tap	worker	no	yes	no	positive	negative	positive	69
87	65	Endometrial cancer	urban	yes	yes	no	no	no	no	tap	farmer	no	yes	no	positive	positive	positive	69
88	66	Endometrial cancer	rural	yes	yes	no	yes	no	yes	tap	farmer	no	yes	no	positive	positive	positive	69
89	55	Endometrial cancer	rural	yes	yes	no	no	yes	no	tap	farmer	no	yes	no	positive	positive	positive	69
90	48	Endometrial cancer	urban	yes	yes	no	no	no	no	tap	farmer	no	no	no	negative	negative	negative	12
91	61	Endometrial cancer	rural	yes	no	no	no	no	no	tap	farmer	no	yes	no	negative	negative	negative	12
92	63	Endometrial cancer	rural	yes	no	no	no	no	no	tap	farmer	no	yes	no	positive	negative	positive	12
93	55	Endometrial cancer	rural	yes	yes	no	no	no	yes	tap	farmer	no	yes	no	positive	negative	positive	12
94	65	Endometrial cancer	rural	yes	yes	no	no	no	no	tap	farmer	no	yes	yes	negative	negative	negative	12
95	65	Endometrial cancer	rural	yes	no	yes	no	yes	no	tap	farmer	no	yes	no	negative	negative	negative	24
96	70	Endometrial cancer	urban	yes	yes	no	no	no	no	tap	farmer	no	yes	no	positive	negative	positive	24
97	70	Endometrial cancer	urban	yes	no	no	no	no	yes	tap	farmer	no	yes	no	negative	negative	negative	24
98	65	Endometrial cancer	rural	yes	no	no	no	no	no	tap	farmer	no	yes	no	negative	negative	negative	24
99	70	Endometrial cancer	rural	yes	yes	no	no	yes	no	tap	farmer	no	yes	no	negative	negative	negative	24
100	59	Endometrial cancer	rural	yes	no	no	no	no	no	tap	farmer	no	yes	no	negative	negative	negative	24
101	45	Endometrial cancer	rural	no	yes	no	no	no	no	tap	farmer	no	yes	no	negative	negative	negative	63
102	64	Endometrial cancer	rural	no	no	no	no	no	no	tap	farmer	no	yes	no	negative	negative	negative	63
103	63	Endometrial cancer	urban	no	no	no	yes	no	yes	tap	farmer	no	yes	no	positive	negative	positive	24
104	63	Endometrial cancer	urban	no	yes	no	yes	yes	yes	tap	farmer	no	yes	no	positive	negative	positive	24
105	64	Endometrial cancer	urban	no	yes	no	yes	no	yes	tap	farmer	no	yes	no	positive	positive	positive	24
106	68	Endometrial cancer	urban	no	no	no	yes	no	yes	tap	farmer	no	yes	no	negative	negative	negative	24
107	51	Endometrial cancer	urban	no	yes	no	no	no	yes	tap	farmer	no	yes	no	positive	positive	positive	24
108	52	Endometrial cancer	urban	yes	no	no	no	no	no	tap	farmer	no	yes	yes	negative	negative	negative	66
109	48	Endometrial cancer	rural	yes	no	yes	no	no	no	tap	farmer	no	yes	no	negative	negative	negative	66
110	59	Endometrial cancer	rural	yes	no	yes	no	no	no	tap	farmer	no	yes	no	negative	negative	negative	66
111	54	Endometrial cancer	urban	no	no	no	yes	no	yes	tap	farmer	no	yes	yes	negative	negative	negative	65
112	64	Endometrial cancer	urban	no	no	no	yes	no	yes	tap	farmer	no	yes	no	negative	negative	negative	65
113	59	Endometrial cancer	urban	no	no	no	yes	no	yes	tap	farmer	no	yes	no	negative	negative	negative	65
114	68	Endometrial cancer	urban	no	no	no	yes	no	yes	tap	farmer	no	yes	no	negative	negative	negative	65
115	57	Endometrial cancer	urban	no	no	no	yes	no	yes	tap	farmer	no	yes	yes	negative	negative	negative	65
116	46	Endometrial cancer	rural	yes	no	no	no	no	no	tap	farmer	no	yes	no	negative	negative	negative	67
117	76	Endometrial cancer	urban	no	no	no	yes	no	yes	tap	farmer	no	yes	yes	negative	negative	negative	58
118	75	Endometrial cancer	rural	no	no	no	no	no	no	tap	farmer	no	yes	no	negative	negative	negative	65
119	65	Endometrial cancer	rural	no	yes	no	yes	no	no	tap	farmer	no	yes	yes	negative	negative	negative	59
120	65	Endometrial cancer	rural	no	yes	no	yes	no	no	tap	farmer	no	yes	no	negative	negative	negative	65
121	64	Endometrial cancer	rural	no	no	no	no	yes	no	tap	farmer	no	yes	no	negative	negative	negative	65
122	59	Endometrial cancer	rural	no	no	no	yes	no	no	tap	farmer	no	yes	no	negative	negative	negative	65
123	77	Endometrial cancer	rural	no	no	no	no	no	no	tap	farmer	no	yes	no	negative	negative	negative	65
124	71	Endometrial cancer	rural	no	no	no	no	no	no	tap	farmer	no	yes	no	negative	negative	negative	65
125	57	Endometrial cancer	rural	no	yes	no	no	no	yes	tap	farmer	no	yes	yes	negative	negative	negative	65
126	63	Endometrial cancer	urban	no	yes	no	no	no	no	tap	farmer	no	yes	no	negative	negative	negative	65
127	61	Endometrial cancer	rural	no	yes	no	no	no	no	tap	farmer	no	yes	yes	negative	negative	negative	65
128	73	Endometrial cancer	rural	no	no	no	no	no	no	tap	farmer	no	yes	no	negative	negative	negative	63
129	61	Endometrial cancer	rural	no	yes	no	no	yes	no	tap	farmer	no	yes	no	negative	negative	negative	63
130	59	Endometrial cancer	rural	no	yes	no	no	no	no	tap	farmer	no	yes	yes	negative	negative	negative	63
131	65	Endometrial cancer	rural	no	no	yes	no	no	no	tap	farmer	no	yes	no	negative	negative	negative	63
132	53	Endometrial cancer	urban	yes	no	no	no	no	yes	tap	farmer	no	yes	no	negative	negative	negative	63
133	54	Endometrial cancer	urban	yes	no	no	no	no	yes	tap	farmer	no	yes	no	negative	negative	negative	62
134	66	Endometrial cancer	urban	yes	yes	no	no	no	yes	tap	farmer	no	yes	no	negative	negative	negative	62
135	62	Endometrial cancer	urban	yes	no	no	yes	yes	yes	tap	farmer	no	yes	yes	negative	negative	negative	62
136	52	Endometrial cancer	urban	no	yes	yes	no	no	yes	tap	farmer	no	yes	no	negative	negative	negative	62
137	55	Endometrial cancer	rural	yes	yes	no	no	no	no	tap	farmer	no	yes	no	negative	negative	negative	62
138	66	Endometrial cancer	urban	yes	no	no	no	no	yes	tap	farmer	no	yes	no	negative	negative	negative	62
139	68	Endometrial cancer	urban	no	no	no	no	no	no	tap	farmer	no	yes	yes	negative	negative	negative	62
140	55	Endometrial cancer	urban	yes	yes	no	yes	no	yes	tap	farmer	no	yes	no	negative	negative	negative	62
141	68	Endometrial cancer	rural	no	no	no	no	no	no	tap	farmer	no	yes	no	negative	negative	negative	62
142	70	Endometrial cancer	rural	yes	yes	no	no	no	no	tap	farmer	no	yes	yes	negative	negative	negative	51
143	55	Endometrial cancer	urban	yes	yes	no	yes	no	yes	tap	farmer	no	yes	no	negative	negative	negative	51
144	45	Endometrial cancer	rural	yes	no	no	no	no	yes	tap	farmer	no	yes	no	negative	negative	negative	51
145	61	Endometrial cancer	rural	yes	yes	no	no	no	no	tap	farmer	no	yes	yes	negative	negative	negative	60
146	59	Endometrial cancer	urban	no	no	no	yes	no	yes	tap	farmer	no	yes	no	negative	negative	negative	51
147	58	Endometrial cancer	urban	no	yes	no	yes	no	yes	tap	farmer	no	yes	no	negative	negative	negative	60
148	53	Endometrial cancer	urban	no	no	no	yes	no	yes	tap	farmer	no	yes	no	negative	negative	negative	53
149	51	Endometrial cancer	urban	yes	yes	no	no	no	yes	tap	farmer	no	yes	no	negative	negative	negative	59
150	70	Ovarian cancer	rural	yes	yes	no	no	no	no	tap	farmer	no	yes	no	positive	negative	positive	55
151	69	Ovarian cancer	urban	no	yes	yes	no	no	no	tap	farmer	yes	yes	no	negative	negative	negative	72
152	49	Ovarian cancer	rural	yes	no	no	no	no	no	tap	farmer	no	yes	no	positive	negative	positive	71
153	64	Ovarian cancer	rural	yes	yes	no	no	no	no	tap	farmer	no	yes	no	positive	negative	positive	72
154	66	Ovarian cancer	urban	yes	yes	no	no	no	yes	tap	farmer	yes	yes	no	negative	negative	negative	12
155	69	Ovarian cancer	rural	yes	yes	yes	no	no	no	tap	farmer	no	yes	no	positive	negative	positive	71
156	46	Ovarian cancer	urban	no	yes	no	no	no	yes	tap	farmer	yes	no	no	negative	negative	negative	24
157	49	Ovarian cancer	urban	no	no	no	no	no	no	river	worker	no	yes	yes	positive	negative	positive	68
158	64	Ovarian cancer	urban	yes	no	no	no	no	no	tap	farmer	no	yes	no	negative	negative	negative	12
159	44	Ovarian cancer	rural	yes	yes	no	no	no	no	tap	farmer	no	no	no	negative	negative	negative	12
160	64	Ovarian cancer	rural	yes	no	no	no	no	no	tap	farmer	no	yes	no	negative	negative	negative	12
161	49	Ovarian cancer	rural	yes	no	no	no	no	no	tap	farmer	yes	no	yes	positive	negative	positive	12
162	63	Ovarian cancer	urban	yes	no	no	no	no	no	tap	farmer	no	yes	no	negative	negative	negative	12
163	64	Ovarian cancer	rural	yes	no	no	no	no	yes	tap	farmer	no	yes	no	negative	negative	negative	12
164	64	Ovarian cancer	urban	yes	yes	no	no	no	yes	tap	farmer	no	yes	no	positive	positive	positive	12
165	64	Ovarian cancer	urban	yes	no	no	no	no	no	tap	farmer	no	yes	no	positive	negative	positive	55
166	48	Ovarian cancer	urban	yes	no	no	yes	no	yes	tap	farmer	no	no	no	positive	positive	positive	12
167	72	Ovarian cancer	urban	no	yes	no	no	no	yes	tap	farmer	yes	yes	no	negative	negative	negative	24
168	64	Ovarian cancer	urban	yes	no	no	no	no	no	tap	farmer	no	yes	no	negative	negative	negative	12
169	46	Ovarian cancer	urban	yes	no	no	yes	no	yes	tap	farmer	no	no	no	negative	negative	negative	12
170	71	Ovarian cancer	urban	yes	yes	no	yes	no	no	tap	farmer	no	yes	no	negative	negative	negative	12
171	46	Ovarian cancer	urban	yes	yes	no	yes	no	yes	river	farmer	yes	yes	no	negative	negative	negative	63
172	64	Ovarian cancer	rural	yes	no	no	no	no	yes	tap	farmer	no	yes	no	negative	negative	negative	12
173	64	Ovarian cancer	urban	yes	yes	no	no	no	no	tap	farmer	no	yes	no	positive	negative	positive	12
174	73	Ovarian cancer	urban	no	no	no	yes	yes	yes	river	farmer	yes	yes	no	negative	negative	negative	62
175	47	Ovarian cancer	urban	yes	no	no	yes	yes	yes	tap	farmer	no	no	no	negative	negative	negative	62
176	60	Ovarian cancer	rural	yes	no	no	no	no	no	tap	farmer	no	yes	no	negative	negative	negative	52
177	47	Ovarian cancer	rural	yes	no	no	no	no	no	tap	farmer	no	yes	no	negative	negative	negative	55
178	60	Ovarian cancer	urban	no	no	yes	no	no	no	tap	farmer	no	yes	no	negative	negative	negative	62
179	72	Ovarian cancer	rural	no	no	no	no	no	yes	tap	farmer	no	yes	no	negative	negative	negative	62
180	64	Ovarian cancer	rural	no	no	no	no	no	no	tap	farmer	no	yes	no	negative	negative	negative	62
181	63	Ovarian cancer	rural	no	no	yes	no	no	yes	tap	farmer	no	yes	no	negative	negative	negative	62
182	62	Ovarian cancer	rural	yes	no	no	no	no	no	tap	farmer	no	yes	no	negative	negative	negative	62
183	69	Ovarian cancer	urban	no	no	yes	no	no	no	tap	farmer	no	yes	no	negative	negative	negative	62
184	66	Ovarian cancer	urban	no	no	yes	no	no	no	tap	farmer	no	yes	yes	positive	negative	positive	53
185	64	Ovarian cancer	rural	no	yes	yes	yes	no	no	tap	farmer	no	yes	no	negative	negative	negative	72
186	73	Ovarian cancer	rural	no	yes	yes	no	no	no	tap	farmer	no	yes	yes	positive	negative	positive	72
187	65	Ovarian cancer	urban	no	yes	no	no	no	no	tap	farmer	no	yes	no	negative	negative	negative	53
188	59	Ovarian cancer	urban	no	yes	no	no	yes	no	tap	farmer	no	yes	yes	negative	negative	negative	72
189	65	Ovarian cancer	urban	no	yes	no	yes	no	yes	tap	farmer	no	yes	no	negative	negative	negative	71
190	73	Ovarian cancer	urban	no	no	no	yes	no	yes	tap	farmer	no	yes	no	positive	negative	positive	71
191	70	Ovarian cancer	urban	no	no	no	yes	no	yes	tap	farmer	no	yes	yes	negative	negative	negative	71
192	71	Ovarian cancer	urban	no	no	no	yes	no	yes	tap	farmer	no	yes	no	negative	negative	negative	70
193	73	Ovarian cancer	urban	no	no	no	no	no	yes	tap	farmer	no	yes	no	negative	negative	negative	70
194	70	Ovarian cancer	urban	no	no	no	yes	yes	yes	tap	farmer	no	yes	no	negative	negative	negative	70
195	63	Ovarian cancer	rural	no	no	no	yes	no	no	tap	farmer	no	yes	no	negative	negative	negative	56
196	77	Ovarian cancer	rural	no	no	no	no	no	yes	tap	farmer	no	no	no	positive	negative	positive	69
197	64	Ovarian cancer	rural	no	no	no	no	no	no	tap	farmer	no	no	no	negative	negative	negative	68
198	59	Ovarian cancer	rural	no	yes	no	no	no	no	tap	farmer	no	no	no	positive	negative	positive	53
199	77	Ovarian cancer	rural	no	yes	no	no	no	no	tap	farmer	no	no	no	negative	negative	negative	68
200	64	Ovarian cancer	rural	yes	yes	no	no	no	no	tap	farmer	no	yes	no	positive	negative	positive	53
201	74	Ovarian cancer	rural	no	no	no	no	no	yes	tap	farmer	no	no	no	negative	negative	negative	67
202	72	Ovarian cancer	rural	no	yes	no	no	no	no	tap	farmer	no	no	no	positive	negative	positive	66
203	65	Ovarian cancer	urban	no	no	no	no	no	no	tap	farmer	no	no	no	positive	negative	positive	58
204	71	Ovarian cancer	urban	no	yes	no	no	no	no	tap	farmer	no	no	no	positive	negative	positive	67
205	65	Ovarian cancer	rural	no	yes	no	no	no	yes	tap	farmer	no	no	yes	negative	negative	negative	67
206	64	Ovarian cancer	urban	no	no	no	no	no	no	tap	farmer	no	no	yes	negative	negative	negative	67
207	72	Ovarian cancer	urban	no	no	no	no	no	yes	tap	farmer	no	no	no	negative	negative	negative	66
208	59	Ovarian cancer	rural	no	no	yes	no	no	no	tap	farmer	no	no	no	negative	negative	negative	66
209	62	Ovarian cancer	rural	no	yes	yes	no	no	yes	tap	farmer	no	no	no	negative	negative	negative	66
210	69	Ovarian cancer	rural	yes	no	yes	no	no	yes	tap	farmer	no	yes	no	negative	negative	negative	65
211	73	Ovarian cancer	rural	no	no	yes	no	no	yes	tap	farmer	no	no	no	negative	negative	negative	65
212	70	Ovarian cancer	rural	no	no	yes	no	no	no	tap	farmer	no	no	no	negative	negative	negative	65
213	72	Ovarian cancer	rural	no	no	no	no	no	no	tap	farmer	no	no	no	negative	negative	negative	65
214	69	Ovarian cancer	rural	no	no	no	no	no	no	tap	farmer	no	no	no	negative	negative	negative	65
215	65	Ovarian cancer	urban	no	no	no	no	no	yes	tap	farmer	no	no	no	negative	negative	negative	63
216	76	Ovarian cancer	urban	no	no	no	no	no	no	tap	farmer	no	no	no	negative	negative	negative	55
217	61	Ovarian cancer	urban	no	no	yes	no	no	no	tap	farmer	no	no	no	negative	negative	negative	65
218	76	Ovarian cancer	urban	no	yes	no	no	yes	no	tap	farmer	no	no	no	positive	negative	positive	65
219	66	Ovarian cancer	urban	no	no	no	no	no	yes	tap	farmer	no	no	no	negative	negative	negative	65
220	64	Ovarian cancer	urban	no	yes	no	no	no	no	tap	farmer	no	no	no	negative	negative	negative	65
221	64	Ovarian cancer	rural	no	yes	yes	no	no	no	tap	farmer	no	no	no	negative	negative	negative	65
222	72	Ovarian cancer	rural	no	no	yes	no	no	no	tap	farmer	no	no	no	negative	negative	negative	65
223	66	Ovarian cancer	rural	no	no	no	no	no	no	tap	farmer	no	no	yes	negative	negative	negative	63
224	58	Ovarian cancer	urban	no	yes	no	no	no	no	tap	farmer	no	no	no	negative	negative	negative	63
225	79	Ovarian cancer	urban	no	yes	no	no	no	no	tap	farmer	no	no	yes	negative	negative	negative	63
226	78	Ovarian cancer	urban	no	yes	no	no	no	no	tap	farmer	no	no	no	negative	negative	negative	60
227	73	Ovarian cancer	urban	no	no	no	no	no	no	tap	farmer	no	no	no	negative	negative	negative	60
228	66	Ovarian cancer	urban	no	yes	no	no	no	no	tap	farmer	no	no	yes	negative	negative	negative	62
229	66	Ovarian cancer	urban	no	yes	no	no	no	no	tap	farmer	no	no	yes	negative	negative	negative	62
230	65	Ovarian cancer	rural	yes	yes	yes	no	yes	no	tap	farmer	no	yes	no	negative	negative	negative	60
231	73	Ovarian cancer	rural	no	no	no	no	no	no	tap	farmer	no	no	yes	negative	negative	negative	54
232	62	Ovarian cancer	rural	no	yes	no	no	no	no	tap	farmer	no	no	no	negative	negative	negative	58
233	72	Ovarian cancer	urban	yes	no	no	no	no	no	tap	farmer	no	yes	no	negative	negative	negative	58
234	64	Ovarian cancer	rural	yes	yes	no	no	yes	no	tap	farmer	no	yes	no	negative	negative	negative	58
235	64	Ovarian cancer	urban	no	no	no	no	yes	yes	tap	farmer	yes	yes	no	negative	negative	negative	58
236	70	Ovarian cancer	urban	no	no	no	yes	yes	yes	tap	farmer	yes	yes	no	negative	negative	negative	58
237	48	Ovarian cancer	urban	no	no	no	yes	no	yes	tap	farmer	yes	yes	no	positive	negative	positive	58
238	45	Ovarian cancer	urban	no	no	no	yes	no	yes	tap	farmer	yes	yes	no	negative	negative	negative	53
239	45	Ovarian cancer	urban	no	no	no	yes	no	yes	tap	farmer	yes	yes	no	negative	negative	negative	56
240	44	Ovarian cancer	urban	no	no	no	yes	no	yes	tap	farmer	yes	yes	no	negative	negative	negative	56
241	73	Ovarian cancer	urban	no	no	no	yes	no	yes	tap	farmer	yes	yes	no	negative	negative	negative	56
242	65	Ovarian cancer	rural	yes	no	yes	no	no	no	tap	farmer	no	yes	no	negative	negative	negative	51
243	64	Ovarian cancer	rural	yes	no	no	no	no	no	tap	farmer	no	yes	no	negative	negative	negative	54
244	63	Ovarian cancer	rural	yes	no	no	no	no	yes	tap	farmer	no	yes	no	negative	negative	negative	54
245	65	Ovarian cancer	rural	yes	no	no	yes	yes	no	tap	farmer	no	yes	no	negative	negative	negative	52
246	66	Ovarian cancer	rural	yes	no	no	no	no	no	tap	farmer	no	yes	no	negative	negative	negative	52
247	65	Ovarian cancer	rural	yes	no	no	no	no	no	tap	farmer	no	yes	yes	negative	negative	negative	51
248	44	Ovarian cancer	rural	yes	no	no	no	no	no	tap	farmer	no	yes	no	negative	negative	negative	51
249	66	Ovarian cancer	urban	no	yes	no	no	no	yes	tap	farmer	no	yes	no	negative	negative	negative	24
250	48	Ovarian cancer	rural	yes	no	no	no	yes	no	river	farmer	no	no	no	negative	negative	negative	24
251	44	Ovarian cancer	rural	yes	no	no	no	yes	no	river	farmer	no	no	no	negative	negative	negative	24
252	71	Ovarian cancer	rural	yes	yes	no	no	yes	yes	river	farmer	no	yes	no	positive	negative	positive	24
253	49	Ovarian cancer	rural	yes	yes	no	no	no	yes	river	farmer	no	no	no	negative	negative	negative	24
254	65	Ovarian cancer	urban	yes	no	no	no	no	yes	river	farmer	no	yes	yes	negative	negative	negative	36
255	66	Ovarian cancer	urban	yes	yes	no	no	no	yes	river	farmer	no	yes	no	negative	negative	negative	12
256	66	Ovarian cancer	urban	yes	no	no	no	yes	yes	river	farmer	no	yes	no	positive	negative	positive	12
257	64	Ovarian cancer	urban	no	no	no	yes	no	yes	river	farmer	no	yes	yes	negative	negative	negative	24
258	71	Ovarian cancer	urban	no	yes	no	no	no	no	river	farmer	no	yes	no	negative	negative	negative	36
259	72	Ovarian cancer	urban	no	no	yes	yes	no	no	river	farmer	no	yes	no	negative	negative	negative	24
260	47	Ovarian cancer	rural	no	no	no	no	no	no	river	farmer	no	no	yes	negative	negative	negative	70
261	63	Ovarian cancer	urban	no	no	no	no	no	yes	river	farmer	no	yes	no	negative	negative	negative	24
262	26	Ovarian cystic mature teratoma	rural	yes	no	no	no	no	no	tap	worker	no	no	no	negative	negative	negative	71
263	21	Ovarian cystic mature teratoma	urban	yes	no	no	no	no	yes	tap	worker	no	no	no	positive	negative	positive	70
264	29	Ovarian cystic mature teratoma	rural	yes	no	no	no	no	no	tap	worker	no	no	no	negative	negative	negative	70
265	26	Ovarian cystic mature teratoma	rural	yes	yes	no	no	no	no	tap	worker	no	no	no	negative	negative	negative	56
266	25	Ovarian cystic mature teratoma	urban	yes	no	no	yes	no	no	river	worker	no	no	no	negative	negative	negative	70
267	23	Ovarian cystic mature teratoma	rural	yes	yes	no	no	no	no	tap	worker	no	no	no	negative	negative	negative	69
268	24	Ovarian cystic mature teratoma	rural	yes	yes	no	yes	no	yes	tap	worker	no	no	no	negative	negative	negative	69
269	35	Ovarian cystic mature teratoma	urban	yes	no	yes	no	yes	no	tap	worker	no	no	no	negative	negative	negative	69
270	24	Ovarian cystic mature teratoma	urban	yes	yes	no	no	no	no	tap	worker	no	no	no	negative	negative	negative	69
271	23	Ovarian cystic mature teratoma	rural	yes	no	no	no	no	no	tap	worker	no	no	no	negative	negative	negative	68
272	30	Ovarian cystic mature teratoma	urban	yes	yes	no	no	no	no	tap	worker	no	no	no	negative	negative	negative	68
273	43	Ovarian cystic mature teratoma	urban	yes	no	no	yes	no	no	tap	worker	no	no	yes	negative	negative	negative	66
274	33	Ovarian cystic mature teratoma	urban	yes	no	no	yes	no	yes	tap	worker	no	no	no	negative	negative	negative	66
275	40	Ovarian cystic mature teratoma	urban	yes	no	no	no	no	yes	tap	worker	no	no	no	negative	negative	negative	66
276	23	Ovarian cystic mature teratoma	urban	yes	yes	no	no	no	no	tap	worker	no	no	no	negative	negative	negative	66
277	23	Ovarian cystic mature teratoma	rural	yes	yes	no	no	no	yes	tap	worker	no	no	no	negative	negative	negative	66
278	25	Ovarian cystic mature teratoma	urban	yes	no	no	no	no	yes	tap	worker	no	no	yes	negative	negative	negative	66
279	27	Ovarian cystic mature teratoma	urban	yes	yes	no	no	no	no	tap	worker	no	no	no	negative	negative	negative	66
280	28	Ovarian cystic mature teratoma	rural	yes	yes	no	no	no	no	tap	worker	no	no	no	negative	negative	negative	66
281	30	Ovarian cystic mature teratoma	urban	yes	no	no	no	no	no	tap	worker	no	no	no	negative	negative	negative	54
282	27	Ovarian cystic mature teratoma	urban	no	no	no	yes	no	yes	river	farmer	no	no	no	negative	negative	negative	65
283	24	Ovarian cystic mature teratoma	urban	no	no	no	yes	no	yes	river	farmer	no	no	no	positive	negative	positive	65
284	40	Ovarian cystic mature teratoma	rural	yes	no	no	no	no	no	tap	worker	no	no	no	negative	negative	negative	65
285	29	Ovarian cystic mature teratoma	urban	no	yes	no	no	no	yes	river	worker	no	no	no	negative	negative	negative	65
286	32	Ovarian cystic mature teratoma	rural	yes	no	no	no	yes	no	tap	worker	no	no	no	negative	negative	negative	65
287	33	Ovarian cystic mature teratoma	urban	yes	no	no	no	no	yes	tap	worker	no	no	no	negative	negative	negative	65
288	48	Ovarian cystic mature teratoma	rural	yes	no	no	no	no	no	tap	worker	no	no	no	negative	negative	negative	62
289	25	Ovarian cystic mature teratoma	urban	no	yes	no	no	no	yes	river	farmer	no	no	yes	negative	negative	negative	62
290	30	Ovarian cystic mature teratoma	urban	yes	yes	no	no	no	no	tap	worker	no	no	no	negative	negative	negative	59
291	25	Ovarian cystic mature teratoma	rural	yes	no	no	no	no	no	tap	worker	no	no	no	negative	negative	negative	59
292	32	Ovarian cystic mature teratoma	urban	yes	yes	no	no	no	yes	tap	worker	no	no	no	negative	negative	negative	59
293	30	Ovarian cystic mature teratoma	rural	no	no	no	no	yes	no	tap	worker	no	no	no	negative	negative	negative	59
294	33	Ovarian cystic mature teratoma	urban	no	no	no	no	yes	no	tap	worker	no	no	no	negative	negative	negative	58
295	29	Ovarian cystic mature teratoma	rural	no	no	yes	no	no	yes	tap	worker	no	no	no	negative	negative	negative	54
296	35	Ovarian cystic mature teratoma	rural	no	yes	no	no	yes	no	river	farmer	no	no	no	negative	negative	negative	58
297	35	Ovarian cystic mature teratoma	rural	no	no	yes	no	no	no	tap	worker	no	no	no	negative	negative	negative	58
298	25	Ovarian cystic mature teratoma	rural	no	yes	no	no	no	no	river	worker	no	no	no	negative	negative	negative	56
299	24	Ovarian cystic mature teratoma	urban	yes	yes	no	no	yes	yes	river	worker	no	no	no	negative	negative	negative	56
300	33	Ovarian cystic mature teratoma	rural	no	no	yes	no	no	no	tap	worker	no	no	no	negative	negative	negative	56
301	26	Ovarian cystic mature teratoma	urban	no	no	no	yes	no	yes	tap	worker	no	no	no	negative	negative	negative	55
302	37	Ovarian cystic mature teratoma	rural	no	yes	no	yes	no	no	tap	worker	no	no	no	negative	negative	negative	54
303	34	Ovarian cystic mature teratoma	urban	no	yes	no	yes	yes	no	tap	worker	no	no	yes	negative	negative	negative	55
304	23	Ovarian cystic mature teratoma	urban	no	no	no	no	no	no	tap	worker	no	no	no	negative	negative	negative	54
305	25	Ovarian cystic mature teratoma	rural	no	no	no	no	no	no	tap	worker	no	no	no	negative	negative	negative	54
306	23	Ovarian cystic mature teratoma	urban	no	yes	no	no	yes	yes	tap	worker	no	no	no	negative	negative	negative	53
307	42	Ovarian cystic mature teratoma	urban	no	no	no	no	no	yes	tap	worker	no	no	no	negative	negative	negative	53
308	34	Ovarian cystic mature teratoma	rural	no	yes	no	no	no	yes	tap	worker	no	no	no	negative	negative	negative	53
309	21	Ovarian cystic mature teratoma	rural	no	yes	no	no	no	no	tap	worker	no	no	yes	positive	negative	positive	53
310	22	Ovarian cystic mature teratoma	rural	no	no	no	yes	no	no	tap	worker	no	no	no	negative	negative	negative	52
311	30	Ovarian cystic mature teratoma	urban	no	yes	yes	no	no	yes	tap	worker	no	no	yes	negative	negative	negative	56
312	24	Ovarian cystic mature teratoma	urban	no	yes	no	yes	no	yes	tap	worker	no	no	yes	negative	negative	negative	53
313	31	Ovarian cystic mature teratoma	urban	no	no	no	no	yes	no	river	farmer	no	no	no	negative	negative	negative	52
314	29	Ovarian cystic mature teratoma	urban	no	no	no	no	no	no	tap	worker	no	no	no	negative	negative	negative	52
315	28	Ovarian cystic mature teratoma	rural	no	no	no	no	yes	yes	river	worker	no	no	no	negative	negative	negative	65
316	41	Ovarian cystic mature teratoma	urban	no	yes	no	no	no	no	tap	worker	no	no	yes	negative	negative	negative	65
317	20	Ovarian cystic mature teratoma	rural	no	no	yes	yes	no	no	tap	worker	no	no	no	positive	negative	positive	65
318	21	Ovarian cystic mature teratoma	urban	no	no	no	no	no	yes	tap	worker	no	no	no	positive	negative	positive	65
319	26	Ovarian cystic mature teratoma	urban	no	no	no	no	no	yes	tap	worker	no	no	no	negative	negative	negative	65
320	28	Ovarian cystic mature teratoma	rural	no	no	yes	no	no	no	tap	worker	no	no	no	negative	negative	negative	65
321	21	Ovarian cystic mature teratoma	rural	no	no	yes	no	no	no	tap	worker	no	no	yes	negative	negative	negative	65
322	35	Ovarian cystic mature teratoma	rural	no	yes	yes	no	no	no	tap	worker	no	no	no	negative	negative	negative	65
323	25	Ovarian cystic mature teratoma	urban	no	no	yes	no	no	no	tap	worker	no	no	no	negative	negative	negative	65
324	32	Ovarian cystic mature teratoma	urban	no	no	yes	yes	no	no	tap	worker	no	no	no	negative	negative	negative	72
325	25	Ovarian cystic mature teratoma	urban	no		yes	no	no	no	tap	worker	no	no	yes	negative	negative	negative	72
326	21	Ovarian cystic mature teratoma	rural	no	no	no	no	yes	no	river	farmer	no	no	yes	negative	negative	negative	72
327	22	Ovarian cystic mature teratoma	urban	no	yes	no	yes	no	no	tap	worker	no	no	no	negative	negative	negative	72
328	30	Ovarian cystic mature teratoma	urban	no	no	no	no	no	yes	tap	worker	no	no	yes	negative	negative	negative	72
329	21	Ovarian cystic mature teratoma	rural	no	no	no	no	yes	no	river	farmer	no	no	yes	negative	negative	negative	72
330	29	Ovarian cystic mature teratoma	rural	no	no	no	no	yes	no	river	worker	no	no	no	negative	negative	negative	72
331	23	Ovarian cystic mature teratoma	rural	no	yes	yes	no	no	no	river	worker	no	no	no	negative	negative	negative	71
332	30	Ovarian cystic mature teratoma	rural	no	no	no	no	yes	yes	river	farmer	no	no	no	negative	negative	negative	71
333	29	Ovarian cystic mature teratoma	urban	no	yes	no	yes	yes	yes	river	worker	no	no	yes	negative	negative	negative	71
334	22	Ovarian cystic mature teratoma	urban	no	no	no	yes	no	no	river	worker	no	no	no	negative	negative	negative	71
335	25	Ovarian cystic mature teratoma	urban	no	no	no	no	no	no	river	worker	no	no	no	negative	negative	negative	71
336	27	Ovarian cystic mature teratoma	urban	no	no	no	no	yes	yes	river	worker	no	no	yes	negative	negative	negative	71
337	38	Ovarian cystic mature teratoma	rural	no	yes	no	no	no	yes	river	worker	no	no	no	negative	negative	negative	70
338	27	Ovarian cystic mature teratoma	urban	no	no	no	yes	yes	no	river	worker	no	no	yes	negative	negative	negative	70
339	40	Ovarian cystic mature teratoma	rural	no	no	no	no	yes	yes	river	farmer	no	no	no	negative	negative	negative	70
340	33	Ovarian cystic mature teratoma	urban	no	yes	no	no	no	yes	river	farmer	no	no	no	negative	negative	negative	70
341	30	Ovarian cystic mature teratoma	rural	no	no	no	no	no	no	river	farmer	no	no	no	negative	negative	negative	70
342	23	Ovarian cystic mature teratoma	rural	no	yes	no	no	no	no	river	farmer	no	no	no	negative	negative	negative	70
343	33	Ovarian cystic mature teratoma	urban	no	yes	yes	no	no	no	river	farmer	no	no	no	negative	negative	negative	69
344	25	Ovarian cystic mature teratoma	rural	no	no	yes	no	no	yes	river	farmer	no	no	no	negative	negative	negative	69
345	39	Ovarian cystic mature teratoma	rural	no	yes	yes	no	no	no	river	farmer	no	no	no	negative	negative	negative	69
346	23	Ovarian cystic mature teratoma	rural	no	no	no	yes	yes	no	river	farmer	no	no	no	negative	negative	negative	69
347	21	Ovarian cystic mature teratoma	rural	no	yes	yes	no	no	no	river	farmer	no	no	no	negative	negative	negative	69
348	28	Ovarian cystic mature teratoma	urban	no	yes	yes	no	no	no	river	farmer	no	no	no	negative	negative	negative	68
349	22	Ovarian cystic mature teratoma	rural	no	no	no	no	yes	no	river	farmer	no	no	no	negative	negative	negative	68
350	37	Ovarian cystic mature teratoma	urban	no	no	no	yes	no	yes	river	farmer	no	no	no	negative	negative	negative	68
351	26	Ovarian cystic mature teratoma	rural	no	no	no	yes	yes	no	river	worker	no	no	no	negative	negative	negative	68
352	34	Ovarian cystic mature teratoma	rural	no	no	no	no	yes	no	river	worker	no	no	no	negative	negative	negative	68
353	30	Ovarian cystic mature teratoma	rural	no	no	no	no	no	no	river	farmer	no	no	no	negative	negative	negative	67
354	19	Ovarian cystic mature teratoma	rural	no	yes	yes	no	no	no	river	farmer	no	no	no	positive	negative	positive	67
355	24	Ovarian cystic mature teratoma	rural	no	no	no	no	yes	no	river	worker	no	no	no	negative	negative	negative	67
356	28	Ovarian cystic mature teratoma	urban	no	yes	no	yes	no	yes	river	farmer	no	no	no	negative	negative	negative	67
357	19	Ovarian cystic mature teratoma	rural	no	no	yes	no	yes	no	river	farmer	no	no	no	positive	negative	positive	66
358	33	Ovarian cystic mature teratoma	rural	no	no	yes	no	yes	yes	river	farmer	no	no	no	negative	negative	negative	66
359	30	Ovarian cystic mature teratoma	rural	no	no	yes	no	no	no	river	farmer	no	no	no	negative	negative	negative	66
360	24	Ovarian cystic mature teratoma	rural	no	no	no	no	no	no	river	farmer	no	no	no	negative	negative	negative	66
361	25	Ovarian cystic mature teratoma	urban	no	no	no	no	yes	no	river	farmer	no	no	no	negative	negative	negative	66
362	21	Ovarian cystic mature teratoma	rural	no	no	no	no	yes	yes	river	farmer	no	no	no	negative	negative	negative	66
363	23	Ovarian cystic mature teratoma	rural	no	no	no	yes	yes	no	river	farmer	no	no	yes	negative	negative	negative	66
364	26	Ovarian cystic mature teratoma	rural	no	no	no	no	yes	no	river	worker	no	no	yes	negative	negative	negative	66
365	28	Ovarian cystic mature teratoma	urban	no	no	no	no	no	yes	tap	worker	no	no	no	negative	negative	negative	66
366	28	Ovarian cystic mature teratoma	urban	no	no	no	yes	no	no	tap	worker	no	no	no	negative	negative	negative	66
367	27	Ovarian cystic mature teratoma	urban	no	no	no	yes	no	no	tap	worker	no	no	no	negative	negative	negative	66
368	43	Ovarian cystic mature teratoma	rural	no	yes	no	yes	no	yes	tap	worker	no	no	yes	negative	negative	negative	66
369	38	Ovarian cystic mature teratoma	rural	no	no	no	no	no	no	tap	worker	no	no	no	negative	negative	negative	65
370	36	Ovarian cystic mature teratoma	urban	no	yes	no	no	yes	no	tap	worker	no	no	no	negative	negative	negative	65
371	21	Ovarian mucinous cystadenoma	rural	no	yes	no	no	no	no	tap	worker	no	no	yes	negative	negative	negative	65
372	33	Ovarian mucinous cystadenoma	urban	no	no	no	no	no	no	tap	farmer	no	no	yes	negative	negative	negative	65
373	25	Ovarian mucinous cystadenoma	rural	yes	yes	no	no	no	yes	tap	farmer	no	no	yes	negative	negative	negative	12
374	21	Ovarian mucinous cystadenoma	rural	yes	yes	yes	no	no	yes	tap	farmer	no	no	no	negative	negative	negative	58
375	31	Ovarian mucinous cystadenoma	rural	no	yes	no	no	no	no	tap	worker	no	no	yes	negative	negative	negative	65
376	19	Ovarian mucinous cystadenoma	urban	yes	no	yes	no	no	yes	tap	worker	no	no	no	positive	negative	positive	12
377	19	Ovarian mucinous cystadenoma	rural	yes	no	no	no	yes	no	river	worker	no	no	no	positive	negative	positive	65
378	39	Ovarian mucinous cystadenoma	rural	yes	no	no	no	yes	yes	river	worker	no	no	no	negative	negative	negative	65
379	22	Ovarian mucinous cystadenoma	urban	no	yes	no	no	no	no	tap	worker	no	no	yes	negative	negative	negative	65
380	23	Ovarian mucinous cystadenoma	rural	yes	no	no	no	yes	no	river	worker	no	no	no	negative	negative	negative	64
381	23	Ovarian mucinous cystadenoma	rural	yes	yes	no	no	no	yes	river	worker	no	no	no	negative	negative	negative	64
382	34	Ovarian mucinous cystadenoma	urban	no	no	yes	no	no	yes	tap	worker	no	no	yes	negative	negative	negative	64
383	24	Ovarian mucinous cystadenoma	rural	no	yes	no	no	yes	no	river	worker	no	no	no	negative	negative	negative	64
384	33	Ovarian mucinous cystadenoma	rural	no	no	yes	no	yes	no	river	worker	no	no	yes	negative	negative	negative	64
385	32	Ovarian mucinous cystadenoma	rural	no	yes	no	no	no	no	tap	worker	no	no	yes	negative	negative	negative	63
386	36	Ovarian mucinous cystadenoma	urban	no	no	no	no	yes	no	river	worker	no	no	no	negative	negative	negative	63
387	29	Ovarian mucinous cystadenoma	urban	no	no	no	no	no	no	tap	worker	no	no	yes	negative	negative	negative	63
388	31	Ovarian mucinous cystadenoma	rural	no	yes	no	no	yes	no	river	worker	no	no	no	negative	negative	negative	63
389	30	Ovarian mucinous cystadenoma	rural	no	yes	no	no	no	yes	river	worker	no	no	no	negative	negative	negative	63
390	24	Ovarian mucinous cystadenoma	urban	no	yes	yes	no	no	no	tap	worker	no	no	yes	negative	negative	negative	62
391	36	Ovarian mucinous cystadenoma	rural	no	yes	no	yes	no	no	tap	worker	no	no	yes	negative	negative	negative	62
392	36	Ovarian mucinous cystadenoma	urban	no	no	no	no	no	no	tap	worker	no	no	yes	negative	negative	negative	62
393	25	Ovarian mucinous cystadenoma	urban	no	yes	no	no	no	yes	tap	worker	no	no	yes	negative	negative	negative	62
394	20	Ovarian mucinous cystadenoma	urban	no	no	no	no	yes	no	tap	worker	no	no	yes	positive	negative	positive	62
395	25	Ovarian mucinous cystadenoma	urban	no	no	no	yes	no	yes	tap	worker	no	no	no	negative	negative	negative	60
396	23	Ovarian mucinous cystadenoma	urban	no	no	no	no	no	yes	tap	worker	no	no	no	negative	negative	negative	60
397	70	Ovarian borderline tumor	urban	no	yes	no	no	no	no	tap	worker	no	yes	no	negative	negative	negative	52
398	66	Ovarian borderline tumor	urban	no	yes	no	no	no	no	tap	worker	no	yes	yes	positive	negative	positive	64
399	64	Ovarian borderline tumor	urban	no	no	no	yes	no	yes	tap	worker	no	yes	no	negative	negative	negative	53
400	49	Ovarian borderline tumor	rural	no	yes	no	no	no	yes	tap	worker	no	yes	yes	negative	negative	negative	64
401	64	Ovarian borderline tumor	urban	no	yes	no	yes	no	no	tap	worker	no	yes	yes	negative	negative	negative	64
402	73	Ovarian borderline tumor	urban	no	no	no	no	no	no	tap	worker	no	no	yes	negative	negative	negative	64
403	64	Ovarian borderline tumor	urban	no	no	no	no	no	yes	tap	worker	no	yes	no	positive	negative	positive	64
404	65	Ovarian borderline tumor	rural	no	yes	no	no	no	no	tap	worker	no	yes	no	negative	negative	negative	64
405	72	Ovarian borderline tumor	rural	no	yes	no	no	no	no	tap	worker	no	no	yes	positive	negative	positive	56
406	72	Ovarian borderline tumor	urban	no	yes	no	yes	no	no	tap	worker	no	no	yes	negative	negative	negative	64
407	63	Ovarian borderline tumor	urban	no	no	no	no	no	yes	tap	worker	no	no	no	positive	negative	positive	64
408	64	Ovarian borderline tumor	urban	no	yes	no	yes	no	no	tap	worker	no	no	yes	negative	negative	negative	63
409	66	Ovarian borderline tumor	urban	no	yes	no	yes	no	yes	tap	worker	no	yes	no	positive	negative	positive	51
410	69	Ovarian borderline tumor	urban	no	yes	no	yes	no	no	tap	worker	no	yes	no	positive	negative	positive	72
411	73	Ovarian borderline tumor	urban	no	yes	no	yes	no	no	tap	worker	no	yes	yes	negative	negative	negative	72
412	50	Uterine leiomyoma	rural	yes	no	no	no	yes	yes	river	farmer	no	no	yes	negative	negative	negative	57
413	44	Uterine leiomyoma	rural	yes	no	no	no	no	no	river	farmer	no	no	no	negative	negative	negative	57
414	46	Uterine leiomyoma	urban	yes	no	no	no	yes	no	river	farmer	no	no	no	negative	negative	negative	57
415	45	Uterine leiomyoma	urban	yes	yes	no	no	no	no	river	farmer	no	no	no	negative	negative	negative	57
416	32	Uterine leiomyoma	rural	yes	yes	no	no	no	yes	river	farmer	no	no	no	negative	negative	negative	57
417	44	Uterine leiomyoma	urban	yes	no	yes	no	yes	no	river	farmer	no	no	no	negative	negative	negative	57
418	43	Uterine leiomyoma	rural	yes	yes	no	no	no	no	river	farmer	no	no	no	negative	negative	negative	57
419	30	Uterine leiomyoma	urban	yes	no	no	no	no	yes	river	farmer	no	no	no	negative	negative	negative	57
420	36	Uterine leiomyoma	urban	yes	no	no	no	no	no	river	farmer	no	no	no	negative	negative	negative	56
421	41	Uterine leiomyoma	rural	no	no	no	no	yes	no	river	farmer	no	no	no	negative	negative	negative	56
422	38	Uterine leiomyoma	rural	no	no	no	no	yes	no	river	farmer	no	no	no	negative	negative	negative	56
423	37	Uterine leiomyoma	urban	no	no	no	yes	no	yes	river	farmer	no	no	no	negative	negative	negative	56
424	45	Uterine leiomyoma	urban	no	no	no	yes	no	yes	river	farmer	no	no	no	negative	negative	negative	56
425	44	Uterine leiomyoma	urban	no	no	no	yes	no	yes	river	farmer	yes	no	yes	negative	negative	negative	55
426	44	Uterine leiomyoma	urban	no	no	no	yes	no	yes	river	farmer	no	no	no	negative	negative	negative	55
427	43	Uterine leiomyoma	urban	no	yes	no	yes	yes	yes	river	farmer	no	no	no	negative	negative	negative	55
428	38	Uterine leiomyoma	urban	no	no	no	no	no	yes	river	farmer	no	no	no	negative	negative	negative	54
429	43	Uterine leiomyoma	urban	no	yes	no	no	no	yes	river	farmer	yes	no	no	negative	negative	negative	54
430	46	Uterine leiomyoma	urban	no	yes	no	yes	no	yes	river	farmer	no	no	no	negative	negative	negative	54
431	35	Uterine leiomyoma	rural	no	no	no	no	no	no	river	farmer	no	no	no	negative	negative	negative	54
432	45	Uterine leiomyoma	rural	no	no	no	no	no	no	river	farmer	no	no	no	negative	negative	negative	53
433	39	Uterine leiomyoma	urban	no	yes	no	yes	no	yes	river	farmer	yes	no	no	negative	negative	negative	53
434	37	Uterine leiomyoma	rural	no	no	no	no	no	no	river	farmer	no	no	no	negative	negative	negative	53
435	40	Uterine leiomyoma	urban	no	yes	no	no	yes	yes	river	farmer	no	no	no	negative	negative	negative	53
436	37	Uterine leiomyoma	urban	no	yes	no	no	no	no	river	farmer	no	no	no	negative	negative	negative	53
437	38	Uterine leiomyoma	rural	no	yes	no	no	yes	no	river	farmer	no	no	no	negative	negative	negative	53
438	44	Uterine leiomyoma	rural	no	no	no	no	no	yes	river	farmer	no	no	no	negative	negative	negative	52
439	38	Uterine leiomyoma	urban	no	yes	no	no	yes	no	river	farmer	no	no	yes	negative	negative	negative	52
440	44	Uterine leiomyoma	urban	no	no	no	no	no	yes	tap	worker	no	no	yes	negative	negative	negative	52
441	48	Uterine leiomyoma	urban	no	yes	no	no	no	no	tap	worker	no	no	yes	negative	negative	negative	52
442	67	Uterine leiomyoma	rural	no	no	no	no	no	yes	tap	worker	no	no	no	negative	negative	negative	51
443	43	Uterine leiomyoma	urban	no	no	no	no	no	no	tap	worker	no	no	no	negative	negative	negative	51
444	30	Uterine leiomyoma	urban	no	no	no	no	no	yes	tap	worker	no	no	no	negative	negative	negative	51
445	33	Uterine leiomyoma	rural	no	yes	no	yes	yes	no	river	farmer	yes	no	yes	negative	negative	negative	51
446	32	Uterine leiomyoma	rural	no	no	no	no	no	no	tap	worker	no	no	yes	negative	negative	negative	51
447	43	Uterine leiomyoma	urban	no	yes	no	yes	no	yes	tap	worker	no	no	yes	negative	negative	negative	57
448	47	Uterine leiomyoma	urban	no	no	no	no	no	no	river	farmer	yes	no	no	negative	negative	negative	57
449	47	Uterine leiomyoma	urban	no	yes	no	no	no	yes	tap	farmer	yes	no	no	positive	negative	positive	56
450	49	Uterine leiomyoma	urban	no	yes	no	yes	no	yes	tap	farmer	yes	no	no	positive	negative	positive	56
451	47	Uterine leiomyoma	urban	no	no	no	yes	no	yes	tap	farmer	yes	no	no	positive	negative	positive	56
452	34	Uterine leiomyoma	urban	no	no	no	no	no	yes	tap	farmer	yes	no	no	negative	negative	negative	56

## Sheet: data for control
Control No.	Age	Residence area	Contact with cats	Contact with dogs	Contact with swine	Consumption of raw/undercooked meat	Consumption of raw vegetables	Exposure to soil	Source of drinking water	History of abortion	occupation	IgG	IgM	Infection	Follow up time(:months)
1	48	urban	no	no	yes	no	no	yes	yes	no	worker	negative	negative	negative	53
2	23	rural	yes	no	no	yes	yes	no	no	no	farmer	negative	negative	negative	53
3	36	rural	no	no	no	no	no	no	yes	yes	farmer	negative	negative	negative	60
4	36	rural	no	no	no	no	yes	yes	yes	no	worker	negative	negative	negative	54
5	36	rural	no	no	no	yes	no	no	yes	yes	farmer	negative	negative	negative	48
6	37	rural	no	no	no	yes	no	no	no	no	farmer	negative	negative	negative	56
7	37	rural	no	yes	no	no	no	yes	no	no	worker	negative	negative	negative	57
8	37	rural	yes	no	yes	no	yes	no	yes	no	worker	negative	negative	negative	58
9	37	urban	no	no	no	no	no	no	no	no	farmer	negative	negative	negative	53
10	23	rural	no	yes	yes	no	no	yes	yes	no	worker	negative	negative	negative	53
11	37	urban	no	yes	no	no	yes	no	no	no	farmer	negative	negative	negative	53
12	37	rural	no	no	no	no	no	yes	yes	no	worker	negative	negative	negative	53
13	38	urban	yes	no	no	yes	no	no	no	yes	farmer	negative	negative	negative	36
14	38	rural	no	yes	no	no	yes	yes	no	no	farmer	positive	negative	positive	53
15	38	rural	no	no	yes	no	no	no	no	yes	worker	negative	negative	negative	53
16	38	urban	no	yes	no	no	yes	no	no	no	farmer	negative	negative	negative	60
17	38	rural	no	no	no	no	no	no	no	no	worker	negative	negative	negative	60
18	38	rural	yes	no	no	no	no	yes	no	yes	worker	negative	negative	negative	60
19	39	urban	no	no	no	no	no	no	yes	no	farmer	negative	negative	negative	60
20	39	urban	yes	no	yes	no	no	yes	no	no	farmer	negative	negative	negative	60
21	24	urban	yes	no	no	no	no	yes	yes	no	farmer	negative	negative	negative	60
22	39	urban	no	no	yes	no	yes	no	yes	no	worker	negative	negative	negative	60
23	40	rural	no	no	no	no	yes	no	no	no	farmer	negative	negative	negative	59
24	40	rural	no	no	no	no	yes	no	yes	no	farmer	negative	negative	negative	59
25	40	urban	no	no	yes	no	yes	no	yes	no	farmer	negative	negative	negative	59
26	40	urban	no	no	no	yes	yes	no	yes	yes	farmer	negative	negative	negative	59
27	41	urban	no	no	no	yes	no	no	no	no	worker	positive	positive	positive	59
28	41	urban	yes	no	no	no	no	no	no	no	farmer	negative	negative	negative	59
29	41	urban	no	no	yes	no	no	no	yes	yes	worker	negative	negative	negative	58
30	42	urban	no	no	no	no	yes	yes	yes	no	farmer	negative	negative	negative	58
31	42	rural	yes	no	yes	no	no	no	yes	no	farmer	negative	negative	negative	58
32	24	rural	no	no	no	yes	yes	yes	no	no	farmer	negative	negative	negative	58
33	42	urban	no	no	no	no	no	no	yes	yes	worker	negative	negative	negative	58
34	43	rural	no	no	no	no	yes	no	yes	no	farmer	negative	negative	negative	58
35	43	rural	no	yes	yes	no	no	yes	yes	no	farmer	positive	negative	positive	57
36	43	rural	no	no	no	no	no	no	no	no	farmer	negative	negative	negative	57
37	43	urban	yes	no	no	no	no	yes	yes	no	farmer	positive	positive	positive	57
38	43	rural	no	no	no	no	no	no	yes	no	farmer	negative	negative	negative	57
39	43	urban	yes	no	no	no	no	no	yes	no	farmer	negative	negative	negative	57
40	43	urban	yes	no	no	no	no	yes	no	no	farmer	negative	negative	negative	56
41	44	urban	no	no	no	yes	yes	no	yes	no	farmer	negative	negative	negative	56
42	44	urban	no	no	no	yes	no	no	yes	no	farmer	negative	negative	negative	56
43	24	rural	yes	no	yes	yes	yes	yes	yes	no	farmer	negative	negative	negative	24
44	44	urban	no	no	no	no	yes	yes	yes	no	worker	negative	negative	negative	56
45	44	urban	no	no	no	no	no	no	yes	yes	worker	negative	negative	negative	55
46	44	rural	no	no	no	no	no	no	yes	no	worker	negative	negative	negative	55
47	44	rural	no	no	no	yes	yes	no	no	no	worker	negative	negative	negative	55
48	44	urban	no	yes	no	yes	no	no	no	yes	farmer	positive	negative	positive	55
49	44	urban	no	no	no	no	no	no	no	no	farmer	negative	negative	negative	54
50	44	urban	yes	yes	yes	yes	no	yes	yes	no	farmer	negative	negative	negative	54
51	44	rural	no	yes	no	yes	no	no	no	no	farmer	negative	negative	negative	54
52	45	urban	no	yes	no	no	no	yes	no	no	worker	negative	negative	negative	54
53	45	rural	no	yes	no	no	no	no	no	no	worker	negative	negative	negative	54
54	24	urban	no	no	no	no	yes	no	yes	no	farmer	negative	negative	negative	54
55	45	rural	yes	no	no	no	no	yes	no	no	farmer	negative	negative	negative	54
56	45	rural	yes	no	no	no	yes	no	yes	no	worker	negative	negative	negative	54
57	45	rural	no	no	no	no	no	no	no	no	farmer	negative	negative	negative	54
58	45	urban	no	no	no	no	no	yes	yes	no	farmer	negative	negative	negative	54
59	45	rural	no	no	no	no	no	yes	yes	no	worker	negative	negative	negative	54
60	46	urban	no	no	no	no	yes	no	yes	no	worker	negative	negative	negative	54
61	46	urban	no	no	no	no	yes	no	yes	no	farmer	negative	negative	negative	53
62	46	rural	yes	no	no	no	no	no	no	no	farmer	negative	negative	negative	53
63	46	rural	no	yes	no	no	no	yes	no	no	worker	negative	negative	negative	53
64	46	urban	no	no	no	yes	yes	no	yes	yes	farmer	negative	negative	negative	53
65	24	rural	no	no	yes	no	yes	no	yes	yes	worker	negative	negative	negative	53
66	46	urban	no	no	no	no	yes	no	yes	no	farmer	negative	negative	negative	53
67	47	rural	no	no	no	no	yes	no	yes	yes	farmer	negative	negative	negative	53
68	47	urban	no	no	yes	no	no	no	no	no	farmer	negative	negative	negative	53
69	47	rural	yes	no	yes	no	no	no	no	no	farmer	negative	negative	negative	53
70	47	urban	yes	no	yes	no	no	no	yes	no	farmer	negative	negative	negative	53
71	47	rural	no	no	no	no	yes	no	yes	no	worker	negative	negative	negative	53
72	47	rural	no	no	no	yes	yes	no	yes	no	worker	negative	negative	negative	53
73	48	urban	no	no	no	no	no	no	no	no	farmer	negative	negative	negative	53
74	48	urban	yes	no	no	no	yes	no	yes	no	farmer	negative	negative	negative	53
75	48	rural	no	no	no	no	no	no	yes	no	farmer	negative	negative	negative	53
76	24	rural	no	yes	no	no	no	no	no	no	farmer	negative	negative	negative	53
77	48	rural	no	yes	no	no	yes	yes	no	no	farmer	negative	negative	negative	53
78	48	rural	no	no	no	no	yes	no	yes	no	farmer	negative	negative	negative	52
79	48	urban	no	no	yes	no	no	no	yes	yes	worker	negative	negative	negative	52
80	48	urban	no	yes	no	no	no	no	no	no	farmer	negative	negative	negative	52
81	49	rural	no	no	no	yes	no	no	no	no	farmer	negative	negative	negative	52
82	49	urban	yes	no	no	yes	yes	no	yes	yes	farmer	negative	negative	negative	36
83	49	urban	no	no	no	no	yes	no	no	no	farmer	negative	negative	negative	51
84	49	urban	no	yes	no	yes	no	no	yes	no	farmer	negative	negative	negative	51
85	49	urban	yes	no	yes	no	yes	no	yes	no	worker	negative	negative	negative	51
86	49	rural	no	no	no	no	yes	no	yes	no	farmer	negative	negative	negative	51
87	24	urban	no	no	no	no	no	no	yes	no	farmer	negative	negative	negative	51
88	50	urban	yes	no	no	no	yes	yes	no	no	farmer	negative	negative	negative	51
89	50	rural	no	no	yes	no	no	no	yes	no	worker	negative	negative	negative	51
90	51	urban	no	no	no	no	no	no	no	no	farmer	negative	negative	negative	51
91	51	urban	yes	yes	no	no	no	no	yes	yes	farmer	positive	negative	positive	48
92	51	rural	no	yes	no	no	no	no	yes	no	farmer	negative	negative	negative	51
93	52	urban	yes	no	yes	no	no	no	yes	no	farmer	negative	negative	negative	51
94	52	rural	no	yes	yes	no	yes	no	no	no	farmer	positive	negative	positive	51
95	53	urban	no	no	no	no	yes	no	no	no	farmer	negative	negative	negative	50
96	53	urban	no	no	no	no	yes	no	yes	yes	worker	negative	negative	negative	50
97	54	urban	no	no	no	no	yes	no	yes	no	farmer	negative	negative	negative	50
98	24	urban	no	yes	yes	no	no	no	no	yes	farmer	negative	negative	negative	49
99	54	urban	no	no	no	no	yes	no	no	no	farmer	negative	negative	negative	49
100	55	urban	no	no	no	no	yes	no	no	no	farmer	negative	negative	negative	49
101	55	urban	no	no	no	no	no	no	yes	yes	worker	positive	negative	positive	49
102	55	rural	yes	no	no	no	no	no	yes	no	worker	negative	negative	negative	48
103	55	urban	no	no	no	no	no	no	no	no	worker	negative	negative	negative	48
104	55	rural	yes	no	no	no	no	no	yes	no	worker	negative	negative	negative	48
105	55	rural	no	no	no	no	yes	yes	no	yes	worker	negative	negative	negative	48
106	57	rural	no	no	no	no	no	yes	yes	no	farmer	negative	negative	negative	48
107	57	urban	no	no	no	no	yes	yes	yes	yes	farmer	negative	negative	negative	48
108	58	urban	no	no	no	no	yes	no	no	no	farmer	negative	negative	negative	48
109	46	urban	no	yes	no	no	no	no	yes	no	farmer	negative	negative	negative	48
110	25	urban	no	no	no	no	yes	no	yes	no	farmer	negative	negative	negative	47
111	58	rural	no	no	no	yes	no	yes	yes	yes	farmer	negative	negative	negative	47
112	58	urban	yes	no	no	no	yes	no	yes	no	farmer	negative	negative	negative	47
113	58	rural	no	no	no	no	no	no	yes	no	farmer	negative	negative	negative	47
114	59	urban	yes	no	no	yes	no	no	no	no	farmer	positive	negative	positive	47
115	59	urban	no	no	no	no	yes	no	no	no	farmer	negative	negative	negative	46
116	59	rural	no	no	no	no	no	no	no	no	farmer	negative	negative	negative	46
117	59	rural	no	no	no	no	yes	no	yes	no	farmer	negative	negative	negative	46
118	59	urban	no	no	no	no	yes	no	no	no	worker	positive	negative	positive	45
119	59	rural	no	no	no	no	yes	no	yes	yes	farmer	negative	negative	negative	45
120	59	urban	yes	no	no	no	yes	no	no	no	farmer	negative	negative	negative	45
121	25	urban	no	yes	no	no	yes	no	yes	no	farmer	positive	negative	positive	45
122	59	urban	no	no	no	no	yes	no	yes	no	worker	negative	negative	negative	44
123	59	urban	no	no	yes	no	yes	no	yes	yes	farmer	negative	negative	negative	44
124	59	rural	no	yes	no	no	no	no	no	no	farmer	negative	negative	negative	44
125	59	urban	no	yes	no	no	yes	no	yes	no	worker	negative	negative	negative	44
126	59	urban	no	no	no	no	yes	no	yes	yes	farmer	negative	negative	negative	44
127	59	urban	no	no	yes	no	yes	no	yes	no	farmer	negative	negative	negative	44
128	60	urban	no	no	no	no	yes	no	yes	no	farmer	negative	negative	negative	43
129	60	urban	yes	no	no	no	yes	no	yes	no	farmer	negative	negative	negative	43
130	61	urban	no	no	no	no	no	no	yes	no	worker	negative	negative	negative	43
131	61	urban	no	no	no	yes	yes	no	no	no	farmer	negative	negative	negative	43
132	25	urban	yes	yes	no	no	yes	yes	yes	no	farmer	positive	negative	positive	24
133	61	urban	no	no	no	no	yes	no	no	no	worker	negative	negative	negative	42
134	61	urban	no	no	yes	no	yes	no	yes	no	worker	negative	negative	negative	47
135	61	rural	no	no	yes	no	yes	no	yes	no	farmer	negative	negative	negative	48
136	61	rural	no	no	no	no	yes	no	no	no	farmer	negative	negative	negative	49
137	61	rural	no	yes	no	yes	no	yes	yes	no	farmer	negative	negative	negative	48
138	61	rural	yes	no	no	no	yes	no	yes	no	worker	negative	negative	negative	48
139	62	rural	no	no	no	no	no	yes	yes	no	worker	negative	negative	negative	47
140	62	urban	no	no	no	no	no	no	yes	no	farmer	negative	negative	negative	47
141	62	urban	no	no	no	no	yes	no	no	no	worker	negative	negative	negative	47
142	63	urban	no	yes	no	no	no	no	yes	no	farmer	negative	negative	negative	47
143	25	urban	yes	no	no	no	no	no	no	no	farmer	negative	negative	negative	47
144	63	urban	yes	no	no	no	yes	no	no	no	farmer	negative	negative	negative	46
145	63	rural	no	no	no	no	yes	no	no	no	farmer	negative	negative	negative	46
146	63	urban	no	no	no	no	yes	no	yes	no	farmer	negative	negative	negative	46
147	63	rural	no	no	yes	no	no	no	no	no	worker	negative	negative	negative	45
148	63	rural	no	no	yes	no	yes	no	yes	no	farmer	negative	negative	negative	45
149	63	rural	yes	no	no	no	yes	no	yes	no	farmer	negative	negative	negative	45
150	63	urban	no	no	no	no	yes	yes	yes	no	farmer	negative	negative	negative	45
151	63	urban	no	no	no	no	yes	yes	yes	no	farmer	negative	negative	negative	44
152	63	urban	no	no	no	no	yes	yes	yes	no	farmer	negative	negative	negative	44
153	63	urban	no	no	no	no	yes	no	yes	no	worker	negative	negative	negative	44
154	25	rural	no	no	no	no	no	no	no	no	farmer	negative	negative	negative	48
155	63	urban	no	yes	no	no	yes	no	yes	no	farmer	negative	negative	negative	44
156	63	urban	no	no	no	no	yes	no	yes	no	farmer	negative	negative	negative	48
157	63	rural	no	no	no	no	yes	no	yes	yes	farmer	negative	negative	negative	43
158	63	rural	no	no	no	no	no	no	no	no	farmer	negative	negative	negative	43
159	63	urban	no	no	no	no	yes	no	no	no	farmer	negative	negative	negative	48
160	63	urban	no	no	no	no	yes	no	yes	yes	farmer	negative	negative	negative	43
161	63	rural	no	no	no	no	yes	no	no	no	worker	negative	negative	negative	42
162	64	rural	no	no	no	no	yes	no	yes	no	farmer	negative	negative	negative	42
163	64	urban	no	yes	no	no	yes	no	no	no	farmer	negative	negative	negative	48
164	64	rural	no	no	yes	no	yes	no	no	no	farmer	negative	negative	negative	48
165	25	urban	no	yes	no	yes	no	yes	no	no	farmer	negative	negative	negative	48
166	64	rural	no	no	no	no	no	no	yes	no	worker	negative	negative	negative	44
167	64	rural	no	yes	no	no	yes	yes	no	no	farmer	negative	negative	negative	50
168	64	rural	yes	no	yes	yes	yes	yes	yes	no	farmer	positive	negative	positive	48
169	64	rural	yes	no	no	yes	yes	no	no	no	farmer	negative	negative	negative	45
170	64	rural	no	no	no	no	yes	no	yes	no	farmer	negative	negative	negative	46
171	64	urban	no	no	no	no	no	no	no	no	worker	negative	negative	negative	47
172	64	urban	no	no	no	no	no	no	no	yes	worker	negative	negative	negative	48
173	64	rural	no	no	no	no	no	no	yes	no	worker	negative	negative	negative	49
174	64	rural	no	no	no	no	yes	yes	yes	no	farmer	negative	negative	negative	50
175	64	rural	no	no	no	no	yes	no	yes	no	farmer	negative	negative	negative	51
176	25	urban	no	no	yes	no	no	no	no	no	farmer	negative	negative	negative	52
177	64	rural	yes	no	no	yes	yes	yes	yes	no	farmer	positive	positive	positive	48
178	64	rural	no	no	no	no	yes	no	yes	no	farmer	negative	negative	negative	53
179	64	urban	no	no	no	no	yes	no	yes	no	farmer	negative	negative	negative	43
180	64	rural	no	no	no	yes	yes	no	yes	no	farmer	negative	negative	negative	53
181	64	rural	no	no	no	no	yes	no	no	no	farmer	negative	negative	negative	53
182	64	rural	no	no	no	no	yes	no	yes	no	farmer	negative	negative	negative	53
183	64	urban	yes	no	no	yes	no	no	no	yes	farmer	positive	negative	positive	48
184	64	urban	no	no	no	yes	yes	no	yes	no	farmer	negative	negative	negative	53
185	64	urban	no	yes	no	yes	no	no	yes	no	farmer	negative	negative	negative	53
186	64	urban	no	no	no	no	yes	no	yes	no	farmer	negative	negative	negative	53
187	25	urban	no	no	no	no	yes	no	yes	no	farmer	negative	negative	negative	53
188	64	rural	no	no	no	no	yes	no	no	no	worker	negative	negative	negative	53
189	64	rural	no	no	no	no	yes	no	yes	yes	worker	negative	negative	negative	60
190	64	urban	no	no	no	no	yes	no	yes	no	worker	negative	negative	negative	60
191	64	urban	yes	no	no	yes	yes	no	yes	no	farmer	negative	negative	negative	60
192	64	urban	no	yes	no	yes	no	no	yes	no	farmer	negative	negative	negative	60
193	64	rural	no	no	no	no	no	no	yes	no	worker	negative	negative	negative	60
194	64	rural	no	no	yes	no	yes	yes	no	no	farmer	negative	negative	negative	60
195	64	rural	no	no	yes	no	yes	no	yes	no	worker	positive	negative	positive	60
196	64	urban	no	yes	no	no	no	no	no	no	farmer	negative	negative	negative	59
197	64	rural	yes	no	no	no	no	yes	no	no	farmer	negative	negative	negative	59
198	25	urban	no	no	no	no	no	no	no	no	worker	negative	negative	negative	59
199	64	urban	no	no	no	no	yes	no	yes	no	farmer	negative	negative	negative	59
200	64	urban	no	no	no	no	yes	no	yes	yes	farmer	negative	negative	negative	59
201	64	rural	no	no	no	no	no	no	yes	no	farmer	negative	negative	negative	59
202	64	urban	no	no	no	yes	yes	no	yes	no	farmer	negative	negative	negative	58
203	64	rural	no	no	yes	no	yes	no	yes	yes	worker	negative	negative	negative	58
204	64	urban	no	yes	no	no	yes	yes	yes	no	farmer	negative	negative	negative	58
205	64	rural	yes	no	yes	no	yes	no	yes	no	worker	negative	negative	negative	58
206	64	urban	no	no	no	no	yes	no	no	no	farmer	negative	negative	negative	58
207	64	rural	no	no	no	no	yes	no	no	yes	worker	negative	negative	negative	58
208	65	urban	no	no	no	no	yes	no	yes	no	worker	negative	negative	negative	57
209	25	urban	no	yes	no	yes	no	yes	no	no	worker	negative	negative	negative	57
210	65	rural	no	no	no	no	yes	no	yes	no	farmer	negative	negative	negative	57
211	65	urban	yes	no	no	no	yes	no	yes	no	farmer	negative	negative	negative	57
212	65	rural	yes	no	yes	no	no	no	yes	no	farmer	negative	negative	negative	57
213	65	rural	no	no	no	no	yes	no	no	yes	farmer	negative	negative	negative	56
214	65	urban	no	no	no	yes	yes	no	yes	no	farmer	negative	negative	negative	56
215	65	rural	no	yes	no	yes	no	yes	yes	no	farmer	negative	negative	negative	56
216	65	rural	no	yes	no	no	no	no	yes	no	farmer	negative	negative	negative	56
217	65	rural	no	no	no	yes	yes	no	yes	yes	worker	negative	negative	negative	56
218	65	rural	no	yes	no	no	yes	no	yes	no	farmer	negative	negative	negative	55
219	65	rural	no	no	yes	no	yes	no	no	no	farmer	negative	negative	negative	55
220	28	rural	no	no	yes	no	yes	no	yes	no	farmer	negative	negative	negative	55
221	25	urban	yes	no	no	no	no	no	no	no	farmer	negative	negative	negative	55
222	65	urban	no	no	no	no	yes	no	yes	no	farmer	negative	negative	negative	54
223	65	urban	no	yes	yes	no	no	no	no	no	farmer	negative	negative	negative	54
224	65	rural	no	yes	no	yes	no	no	no	yes	farmer	negative	negative	negative	54
225	65	urban	no	no	no	no	yes	no	yes	no	worker	negative	negative	negative	54
226	65	urban	no	yes	no	no	no	no	yes	no	farmer	negative	negative	negative	54
227	65	rural	yes	no	yes	yes	yes	no	yes	no	farmer	negative	negative	negative	54
228	65	urban	no	no	yes	no	no	no	yes	no	worker	negative	negative	negative	54
229	65	urban	no	no	no	no	yes	no	yes	no	farmer	negative	negative	negative	54
230	65	rural	yes	no	no	no	yes	yes	yes	no	farmer	positive	negative	positive	60
231	65	rural	yes	no	no	yes	no	no	no	no	farmer	negative	negative	negative	54
232	25	rural	no	no	no	no	no	no	yes	no	farmer	negative	negative	negative	54
233	65	urban	no	no	no	no	no	yes	no	no	worker	negative	negative	negative	54
234	65	rural	no	no	no	yes	yes	no	yes	no	farmer	negative	negative	negative	53
235	65	urban	yes	yes	no	no	no	no	yes	no	farmer	negative	negative	negative	53
236	65	urban	no	no	no	yes	yes	no	yes	no	farmer	negative	negative	negative	53
237	65	rural	no	no	no	no	no	no	no	no	farmer	negative	negative	negative	48
238	65	rural	no	no	no	no	yes	no	yes	no	farmer	negative	negative	negative	53
239	65	rural	no	yes	no	no	no	no	yes	no	farmer	negative	negative	negative	48
240	65	rural	no	no	no	no	yes	no	no	no	worker	negative	negative	negative	48
241	66	rural	no	no	no	no	no	no	yes	no	farmer	negative	negative	negative	53
242	66	rural	yes	no	no	no	no	no	no	no	worker	negative	negative	negative	48
243	25	urban	no	no	no	no	yes	no	no	no	worker	negative	negative	negative	53
244	66	urban	no	no	yes	no	yes	no	yes	no	farmer	negative	negative	negative	53
245	66	urban	no	no	no	no	yes	no	yes	no	worker	negative	negative	negative	53
246	66	urban	yes	no	no	no	no	yes	yes	no	farmer	negative	negative	negative	53
247	66	urban	no	yes	no	no	no	no	no	no	worker	negative	negative	negative	53
248	66	urban	no	no	no	no	no	no	no	no	farmer	negative	negative	negative	53
249	66	urban	no	no	no	no	no	no	no	no	farmer	negative	negative	negative	53
250	66	urban	yes	yes	no	no	no	yes	no	no	worker	negative	negative	negative	53
251	66	urban	no	yes	yes	no	yes	no	yes	no	worker	negative	negative	negative	52
252	66	urban	no	no	no	yes	no	no	yes	no	farmer	negative	negative	negative	52
253	66	urban	no	no	no	no	yes	no	no	no	farmer	negative	negative	negative	52
254	25	urban	no	no	no	no	no	no	no	no	worker	negative	negative	negative	52
255	66	rural	no	no	no	no	no	yes	yes	no	farmer	negative	negative	negative	52
256	66	urban	no	no	no	no	no	no	yes	no	farmer	negative	negative	negative	51
257	66	urban	no	yes	no	no	no	no	yes	no	farmer	negative	negative	negative	51
258	66	urban	yes	no	no	yes	no	no	no	no	farmer	negative	negative	negative	51
259	66	rural	no	no	yes	no	yes	yes	yes	no	farmer	negative	negative	negative	51
260	66	rural	yes	no	no	no	no	no	yes	no	farmer	negative	negative	negative	51
261	66	urban	no	no	no	no	no	no	yes	no	farmer	negative	negative	negative	51
262	67	urban	no	no	no	no	no	no	no	no	farmer	negative	negative	negative	51
263	68	rural	no	no	no	no	yes	no	no	no	farmer	negative	negative	negative	51
264	68	urban	no	no	no	no	yes	no	yes	no	worker	negative	negative	negative	51
265	26	urban	no	yes	no	no	no	no	no	no	farmer	positive	negative	positive	47
266	68	urban	no	no	no	no	yes	no	yes	no	farmer	negative	negative	negative	47
267	68	urban	no	no	no	no	no	yes	no	no	farmer	negative	negative	negative	47
268	68	urban	no	yes	no	no	yes	no	no	no	worker	negative	negative	negative	50
269	68	urban	no	no	yes	no	yes	no	no	no	farmer	negative	negative	negative	47
270	69	urban	no	no	yes	no	no	no	yes	no	farmer	negative	negative	negative	50
271	69	rural	yes	yes	yes	no	no	no	no	yes	worker	negative	negative	negative	47
272	69	rural	no	no	no	no	no	yes	yes	no	farmer	negative	negative	negative	49
273	69	urban	yes	yes	yes	no	no	no	no	no	farmer	negative	negative	negative	49
274	69	urban	yes	no	no	no	no	no	yes	no	worker	negative	negative	negative	49
275	69	rural	no	no	no	no	yes	no	yes	no	farmer	negative	negative	negative	48
276	26	urban	no	no	yes	no	no	no	no	no	worker	negative	negative	negative	48
277	69	urban	yes	no	no	no	yes	yes	no	no	farmer	negative	negative	negative	48
278	70	urban	no	no	no	yes	no	no	yes	no	worker	negative	negative	negative	48
279	70	urban	no	yes	yes	yes	no	no	yes	no	farmer	negative	negative	negative	47
280	70	urban	no	no	no	yes	yes	no	yes	no	farmer	negative	negative	negative	47
281	70	rural	yes	no	no	no	yes	no	yes	no	farmer	negative	negative	negative	47
282	70	urban	no	no	no	no	yes	no	no	no	farmer	positive	negative	positive	47
283	26	urban	no	no	yes	no	yes	no	yes	no	farmer	negative	negative	negative	47
284	70	urban	no	yes	no	no	no	no	yes	no	farmer	negative	negative	negative	46
285	70	urban	yes	no	no	yes	no	no	yes	no	farmer	negative	negative	negative	46
286	70	rural	no	no	no	no	no	no	yes	no	worker	negative	negative	negative	46
287	70	urban	no	no	no	yes	no	yes	yes	no	farmer	negative	negative	negative	45
288	70	urban	yes	no	no	no	no	no	no	no	worker	negative	negative	negative	45
289	70	rural	no	no	yes	no	yes	yes	yes	no	farmer	positive	negative	positive	45
290	70	rural	no	no	no	yes	yes	yes	yes	no	farmer	negative	negative	negative	45
291	70	urban	no	no	no	no	no	yes	no	no	farmer	negative	negative	negative	44
292	70	urban	no	no	no	no	no	yes	yes	no	farmer	negative	negative	negative	44
293	70	urban	no	no	no	no	no	no	yes	yes	farmer	negative	negative	negative	44
294	26	urban	no	yes	yes	no	no	no	no	no	farmer	negative	negative	negative	44
295	70	urban	no	no	no	no	no	no	no	no	farmer	negative	negative	negative	44
296	70	urban	no	no	no	no	no	yes	no	yes	farmer	negative	negative	negative	44
297	70	rural	yes	no	yes	no	no	no	no	no	worker	negative	negative	negative	43
298	71	urban	no	no	no	yes	yes	no	no	no	worker	negative	negative	negative	43
299	71	rural	yes	yes	no	no	no	no	no	yes	farmer	negative	negative	negative	43
300	71	rural	yes	no	no	yes	no	yes	yes	yes	worker	negative	negative	negative	43
301	71	rural	yes	no	no	no	no	yes	yes	no	worker	negative	negative	negative	42
302	71	rural	yes	no	yes	no	no	no	yes	no	worker	negative	negative	negative	42
303	71	urban	yes	no	no	no	yes	yes	yes	yes	worker	negative	negative	negative	42
304	71	rural	yes	no	no	no	yes	yes	no	yes	farmer	negative	negative	negative	42
305	26	rural	no	yes	no	no	yes	no	yes	no	farmer	negative	negative	negative	42
306	71	rural	yes	no	no	no	yes	no	no	no	worker	negative	negative	negative	48
307	71	urban	yes	yes	no	no	no	yes	yes	yes	worker	negative	negative	negative	48
308	71	rural	yes	yes	yes	no	no	yes	no	yes	farmer	negative	negative	negative	47
309	71	rural	yes	no	no	no	no	yes	yes	yes	worker	negative	negative	negative	47
310	72	urban	yes	no	no	no	no	yes	no	yes	farmer	negative	negative	negative	47
311	72	urban	yes	no	no	no	no	yes	yes	yes	worker	negative	negative	negative	47
312	72	urban	yes	no	no	no	no	yes	no	yes	worker	negative	negative	negative	47
313	72	rural	yes	no	no	no	no	yes	no	yes	worker	negative	negative	negative	46
314	72	rural	yes	no	yes	no	no	yes	yes	yes	worker	negative	negative	negative	46
315	72	rural	yes	no	yes	yes	no	yes	yes	yes	worker	negative	negative	negative	46
316	26	urban	no	yes	no	no	yes	no	yes	yes	worker	negative	negative	negative	45
317	72	urban	yes	no	no	no	no	yes	no	yes	worker	negative	negative	negative	45
318	68	rural	yes	yes	no	no	no	yes	no	yes	farmer	negative	negative	negative	45
319	64	urban	yes	yes	no	no	no	yes	yes	yes	worker	negative	negative	negative	45
320	52	urban	yes	yes	no	no	no	yes	yes	yes	farmer	negative	negative	negative	44
321	65	rural	yes	yes	no	no	no	yes	no	yes	farmer	negative	negative	negative	45
322	70	urban	yes	yes	no	no	no	yes	no	yes	worker	negative	negative	negative	46
323	67	rural	yes	yes	no	yes	no	no	yes	yes	farmer	negative	negative	negative	47
324	55	rural	yes	yes	yes	yes	no	yes	yes	no	worker	negative	negative	negative	48
325	71	rural	yes	no	yes	no	no	yes	yes	yes	farmer	negative	negative	negative	49
326	51	rural	yes	no	no	yes	no	yes	yes	yes	worker	negative	negative	negative	50
327	41	rural	yes	no	no	no	yes	yes	yes	no	farmer	negative	negative	negative	12
328	27	urban	no	no	yes	no	yes	no	yes	yes	farmer	negative	negative	negative	52
329	72	rural	yes	no	no	yes	no	yes	no	yes	worker	negative	negative	negative	53
330	73	rural	yes	yes	no	yes	no	no	yes	no	farmer	negative	negative	negative	54
331	64	rural	yes	no	no	no	no	yes	no	yes	worker	negative	negative	negative	55
332	75	rural	yes	yes	no	yes	no	no	no	yes	worker	negative	negative	negative	56
333	61	urban	yes	yes	no	no	no	yes	yes	yes	farmer	negative	negative	negative	57
334	57	rural	yes	yes	no	no	no	yes	yes	no	worker	negative	negative	negative	58
335	50	urban	yes	yes	no	yes	no	yes	yes	yes	worker	negative	negative	negative	59
336	70	rural	yes	yes	yes	no	no	yes	no	no	farmer	negative	negative	negative	59
337	56	rural	yes	no	no	no	no	no	yes	yes	worker	negative	negative	negative	59
338	56	rural	yes	no	no	yes	no	no	yes	no	worker	negative	negative	negative	59
339	27	urban	no	no	no	no	yes	no	no	no	worker	negative	negative	negative	59
340	71	rural	yes	no	no	no	no	yes	yes	no	worker	negative	negative	negative	58
341	61	rural	yes	no	yes	yes	no	no	yes	no	worker	negative	negative	negative	58
342	39	rural	yes	yes	no	no	no	yes	yes	yes	worker	negative	negative	negative	58
343	48	rural	yes	no	no	no	no	no	no	yes	worker	negative	negative	negative	58
344	58	rural	yes	yes	no	no	no	no	yes	no	worker	negative	negative	negative	58
345	47	rural	yes	yes	yes	no	no	yes	no	no	farmer	negative	negative	negative	58
346	47	rural	yes	yes	yes	no	no	yes	yes	yes	farmer	negative	negative	negative	57
347	55	rural	no	no	yes	no	no	yes	yes	yes	worker	negative	negative	negative	57
348	75	urban	no	yes	no	no	yes	yes	no	yes	farmer	negative	negative	negative	57
349	57	urban	no	no	yes	no	yes	yes	no	yes	farmer	negative	negative	negative	57
350	27	rural	no	no	yes	no	yes	no	no	yes	farmer	negative	negative	negative	48
351	77	rural	no	no	yes	no	yes	no	no	no	farmer	negative	negative	negative	54
352	64	rural	no	no	yes	no	yes	yes	yes	no	worker	negative	negative	negative	55
353	77	rural	no	no	yes	no	yes	yes	yes	no	farmer	negative	negative	negative	56
354	63	urban	no	no	no	no	yes	yes	no	yes	farmer	negative	negative	negative	57
355	54	rural	no	yes	no	no	no	no	no	yes	worker	negative	negative	negative	58
356	65	rural	no	yes	no	no	no	yes	yes	yes	farmer	negative	negative	negative	51
357	65	rural	no	no	no	no	no	yes	yes	no	farmer	negative	negative	negative	52
358	50	urban	no	no	no	no	no	yes	no	yes	worker	negative	negative	negative	53
359	65	rural	no	no	no	no	no	yes	no	yes	farmer	negative	negative	negative	54
360	55	urban	no	no	no	no	no	no	yes	yes	farmer	negative	negative	negative	55
361	27	rural	yes	no	no	no	no	no	yes	no	farmer	negative	negative	negative	56
362	73	urban	no	yes	no	no	no	yes	yes	yes	farmer	negative	negative	negative	47
363	60	urban	no	no	no	no	no	yes	no	yes	worker	negative	negative	negative	47
364	59	rural	no	yes	yes	no	no	yes	yes	no	worker	negative	negative	negative	57
365	64	urban	no	no	no	no	no	yes	no	yes	worker	negative	negative	negative	58
366	67	rural	no	no	no	no	no	no	no	no	worker	negative	negative	negative	59
367	65	rural	no	yes	no	no	no	yes	yes	yes	worker	negative	negative	negative	43
368	78	rural	no	yes	no	no	no	yes	yes	no	worker	negative	negative	negative	44
369	62	urban	no	yes	no	no	no	yes	no	yes	worker	negative	negative	negative	54
370	54	urban	no	yes	yes	no	no	yes	no	yes	worker	negative	negative	negative	54
371	71	urban	no	yes	no	no	yes	yes	yes	yes	farmer	negative	negative	negative	54
372	28	urban	no	no	no	no	no	no	yes	no	worker	negative	negative	negative	53
373	79	urban	no	yes	yes	no	yes	yes	yes	yes	farmer	negative	negative	negative	53
374	46	rural	no	yes	yes	no	no	yes	yes	yes	farmer	negative	negative	negative	53
375	77	urban	no	no	no	no	no	yes	yes	yes	worker	negative	negative	negative	53
376	62	urban	no	no	no	yes	no	yes	yes	yes	worker	negative	negative	negative	53
377	66	rural	no	no	yes	no	no	no	no	yes	farmer	negative	negative	negative	55
378	55	rural	no	no	no	no	no	yes	no	yes	worker	negative	negative	negative	48
379	77	urban	no	no	yes	no	no	yes	yes	yes	worker	negative	negative	negative	53
380	61	urban	no	no	no	no	yes	yes	yes	yes	farmer	negative	negative	negative	49
381	76	urban	no	no	yes	no	no	yes	yes	yes	farmer	negative	negative	negative	53
382	70	rural	no	yes	no	yes	no	no	yes	yes	farmer	negative	negative	negative	53
383	28	urban	yes	no	no	no	no	no	no	no	farmer	negative	negative	negative	53
384	74	urban	no	yes	no	no	no	yes	no	yes	farmer	negative	negative	negative	53
385	69	rural	no	yes	no	no	no	yes	no	yes	farmer	negative	negative	negative	53
386	54	urban	no	no	no	no	yes	yes	no	yes	farmer	negative	negative	negative	53
387	53	rural	no	yes	no	no	no	yes	yes	yes	worker	negative	negative	negative	53
388	63	rural	no	no	no	no	no	yes	no	yes	farmer	negative	negative	negative	53
389	78	rural	no	yes	yes	no	yes	no	yes	yes	worker	negative	negative	negative	52
390	60	rural	no	no	yes	no	yes	yes	yes	yes	farmer	negative	negative	negative	52
391	60	urban	no	yes	yes	no	no	yes	yes	yes	farmer	negative	negative	negative	52
392	65	urban	no	yes	no	no	no	yes	no	yes	farmer	negative	negative	negative	52
393	64	rural	no	yes	no	yes	no	yes	no	no	worker	negative	negative	negative	52
394	28	rural	no	no	no	no	yes	no	no	no	farmer	negative	negative	negative	51
395	67	rural	no	yes	no	no	no	yes	no	no	worker	negative	negative	negative	51
396	28	rural	no	no	no	no	yes	no	no	no	farmer	negative	negative	negative	51
397	28	urban	no	no	yes	no	no	no	yes	no	farmer	negative	negative	negative	51
398	28	urban	no	no	no	no	yes	no	yes	yes	worker	negative	negative	negative	51
399	31	urban	no	no	no	no	no	no	no	no	farmer	negative	negative	negative	51
400	29	urban	no	no	no	no	yes	no	yes	yes	farmer	positive	positive	positive	48
401	29	rural	no	no	no	yes	yes	no	yes	no	worker	negative	negative	negative	51
402	29	urban	no	no	no	yes	no	no	yes	yes	farmer	negative	negative	negative	51
403	29	urban	no	no	no	yes	yes	no	yes	no	farmer	negative	negative	negative	42
404	29	rural	yes	no	yes	yes	yes	no	yes	no	farmer	negative	negative	negative	42
405	29	urban	no	no	yes	no	yes	yes	no	no	farmer	negative	negative	negative	42
406	29	rural	no	no	no	no	yes	no	no	no	worker	negative	negative	negative	50
407	30	urban	no	no	no	no	yes	no	yes	no	farmer	negative	negative	negative	42
408	30	urban	no	yes	no	no	no	yes	no	no	worker	positive	negative	positive	50
409	30	rural	yes	no	no	no	no	yes	no	no	farmer	negative	negative	negative	44
410	23	urban	no	yes	no	yes	no	yes	no	no	farmer	negative	negative	negative	49
411	30	urban	no	no	no	no	yes	no	no	no	farmer	negative	negative	negative	49
412	30	rural	yes	no	no	yes	yes	yes	yes	no	farmer	negative	negative	negative	60
413	30	rural	no	yes	no	no	no	yes	no	no	farmer	negative	negative	negative	48
414	30	rural	no	no	no	no	no	no	no	yes	worker	negative	negative	negative	48
415	30	rural	no	no	no	no	yes	no	yes	no	farmer	negative	negative	negative	48
416	30	rural	no	no	no	no	no	yes	yes	yes	worker	negative	negative	negative	48
417	30	rural	no	no	no	no	no	no	no	no	worker	negative	negative	negative	48
418	30	rural	no	no	no	no	yes	no	yes	no	farmer	negative	negative	negative	48
419	30	rural	no	no	no	no	no	no	yes	no	farmer	negative	negative	negative	48
420	30	urban	no	no	no	no	yes	yes	yes	no	farmer	negative	negative	negative	48
421	23	rural	no	yes	no	no	yes	yes	no	no	farmer	positive	negative	positive	47
422	31	rural	yes	no	no	no	no	no	yes	no	farmer	negative	negative	negative	47
423	31	urban	no	no	no	no	no	yes	yes	no	worker	negative	negative	negative	47
424	31	rural	no	yes	no	no	yes	no	yes	no	farmer	positive	negative	positive	47
425	32	rural	yes	no	no	no	no	yes	yes	no	farmer	negative	negative	negative	47
426	32	urban	no	yes	yes	no	no	no	no	no	farmer	positive	negative	positive	46
427	32	urban	no	no	yes	no	yes	no	no	no	worker	negative	negative	negative	46
428	32	urban	no	no	no	no	no	no	no	yes	farmer	negative	negative	negative	46
429	32	urban	no	no	no	no	yes	yes	yes	yes	farmer	negative	negative	negative	45
430	32	urban	no	no	no	no	yes	no	yes	no	farmer	negative	negative	negative	45
431	32	rural	no	no	no	no	no	no	yes	no	worker	negative	negative	negative	45
432	23	urban	no	no	no	no	yes	no	yes	no	worker	negative	negative	negative	45
433	33	urban	no	no	no	no	yes	no	no	no	worker	negative	negative	negative	44
434	33	rural	no	no	yes	no	yes	no	yes	no	worker	negative	negative	negative	44
435	33	urban	no	no	no	no	yes	no	yes	no	farmer	negative	negative	negative	44
436	33	urban	no	no	no	no	no	no	no	no	worker	negative	negative	negative	44
437	33	urban	no	no	no	yes	yes	no	no	no	farmer	negative	negative	negative	44
438	33	urban	no	no	yes	no	no	no	no	no	worker	negative	negative	negative	44
439	33	rural	no	no	no	no	no	no	no	no	farmer	negative	negative	negative	43
440	33	urban	yes	no	no	no	yes	no	no	no	farmer	negative	negative	negative	43
441	33	urban	yes	no	no	no	no	no	yes	no	worker	negative	negative	negative	43
442	33	urban	no	no	no	no	no	yes	no	no	worker	negative	negative	negative	43
443	23	urban	no	no	no	no	no	no	no	no	farmer	negative	negative	negative	42
444	33	rural	no	yes	no	no	yes	no	yes	no	farmer	negative	negative	negative	42
445	34	urban	no	yes	no	no	yes	yes	yes	yes	farmer	negative	negative	negative	42
446	34	rural	no	yes	no	no	no	no	yes	no	worker	positive	negative	positive	42
447	34	rural	yes	no	no	no	no	no	no	yes	worker	negative	negative	negative	42
448	34	rural	no	no	no	no	no	no	yes	no	farmer	negative	negative	negative	48
449	34	urban	no	no	yes	no	yes	no	yes	no	worker	negative	negative	negative	48
450	35	urban	yes	no	no	yes	no	yes	no	no	farmer	negative	negative	negative	47
451	35	rural	no	no	no	no	yes	no	yes	no	farmer	negative	negative	negative	47
452	35	urban	yes	no	no	yes	no	no	no	no	farmer	negative	negative	negative	47
